16 **ABSTRACT**

17 The contributions of skeletal cells to the processes of B cell development in the bone marrow (BM)  
18 have not been completely described. The von-Hippel Lindau protein (VHL) plays a key role in  
19 cellular responses to hypoxia. Previous work showed that *Dmp1-Cre;Vhl* conditional knockout  
20 mice (*VhlcKO*), which delete *Vhl* in late osteoblasts and osteocytes, display dysregulated bone  
21 growth and reduction in B cells. Here, we investigated the mechanisms underlying the B cell  
22 defects using flow cytometry and high-resolution imaging. In the *VhlcKO* BM, B cell progenitors  
23 were increased in frequency and number, whereas Hardy Fractions B-F were decreased. *VhlcKO*  
24 Fractions B-C cells showed increased apoptosis and quiescence. Reciprocal BM chimeras  
25 confirmed a B cell-extrinsic source of the *VhlcKO* B cell defects. In support of this, *VhlcKO* BM  
26 serum contained reduced CXCL12 and elevated EPO levels. Staining of *VhlcKO* B cells with an  
27 intracellular hypoxic marker indicated the natural existence of distinct B cell microenvironments  
28 that differ in local oxygen tensions. Additionally, intravital and ex vivo imaging revealed *VhlcKO*  
29 BM blood vessels with increased diameter, frequency, volume, and a diminished blood-BM  
30 barrier. Our studies identify novel mechanisms linking altered bone homeostasis with drastic BM  
31 microenvironmental changes that dysregulate B cell development.

32

## 33 INTRODUCTION

34 The mechanisms by which changes in bone homeostasis affect immune development in the  
35 bone marrow (BM) are not fully understood (1-4). A detailed understanding of how bone  
36 microenvironments affect immune cell development and function could provide strategies towards  
37 novel therapeutic approaches to immune deficiencies. B cells produce antibodies (Abs), which are  
38 crucial for a robust adaptive immune response. B cells are generated from hematopoietic stem cells  
39 (HSCs) in the liver during fetal life, and in the BM in the adult (5). B cell development in the BM  
40 occurs in a series of defined stages that rely on growth factors that are produced by osteolineage  
41 derived cells in the BM microenvironment, such as mesenchymal stem cells (MSCs) and  
42 osteoblasts (OBs) (1).

43 The von-Hippel Lindau protein (VHL) regulates hypoxia-inducible factor (HIF)  
44 degradation, which is involved in cellular adaptation to low oxygen environments (6). When  
45 HIF1 $\alpha$  accumulates in normoxic conditions, it travels to the nucleus to activate over 100 hypoxia-  
46 inducible target genes (7). VHL is expressed ubiquitously in many cell types, and global deletion  
47 of the *Vhl* gene results in embryonic lethality, so conditional knockout approaches are necessary  
48 to investigate the cell-specific roles of VHL in specific microenvironments. Conditional-deletion  
49 of *Vhl* in OBs and in hematopoietic progenitors have demonstrated a role for VHL in these cell  
50 types (8, 9). OBs support B cell development, and also mature into osteocytes (OCYs). The role  
51 of HIF and its regulation on the immune system has been extensively reviewed, but the mechanism  
52 of cell-intrinsic and cell-extrinsic VHL on specific immune cell lineages has not fully been  
53 addressed (10).

54 The BM microenvironment manifests hypoxic heterogeneities in a spatio-temporal manner  
55 (11), however the implications of these oxygen tension (pO<sub>2</sub>) differences on hematopoiesis are not

56 well characterized. Hypoxia slows the processes of angiogenesis and osteogenesis during fracture  
57 healing and bone formation, but also promotes OB differentiation into OCYs (12), and can  
58 stimulate osteoclast formation (13). Studies have shown HIF stabilization as a therapeutic option  
59 for treating bone fractures (14, 15) and osteoporosis (16-18), but the underlying molecular  
60 mechanism remains poorly understood. VHL plays an important role regulating HIF expression,  
61 and disruption of VHL in bone cells leads to improper bone homeostasis. VHL depletion in  
62 osteochondral progenitor cells and osteocalcin-positive OBs leads to an increase in bone mass  
63 through an increase in OB number (7, 19). Furthermore, disrupting VHL in OBs induces  
64 expression of  $\beta$ -catenin, revealing the mechanism by which VHL/HIF pathway promotes bone  
65 formation through the Wnt pathway (7, 20, 21). Altogether, these studies of *Vhl* deletion in  
66 osteolineage cells have not examined the cell-extrinsic effects of these changes on the immune  
67 cells residing in the BM.

68         The BM contains specialized microenvironments that maintain blood cells and supply  
69 factors required for their development and maintenance. Perivascular stromal cells,  
70 osteoprogenitor cells, endothelial cells (ECs), MSCs, OBs and OCYs are critical B cell “niches”  
71 and are all cells that support B cell development. Collectively, these cells provide essential  
72 cytokines for B cell development which include CXC-chemokine ligand 12 (CXCL12), FLT3  
73 ligand (FLT3L), IL-7, stem-cell factor (SCF) and receptor activator of nuclear factor- $\kappa$ B ligand  
74 (RANKL) (1, 22-31). Development of B cells starts at the pre-pro-B cell (Fraction A) stage where  
75 they are near OBs and CXCL12<sup>+</sup> reticular cells, and as B cells continue to mature to the pro-B cell  
76 stage (Fractions B-C), they move closer to IL-7 expressing cells; the CXCL12/IL7 levels in the  
77 niche is crucial to sustain B cell development (4, 27-29, 31, 32). Furthermore, the BM contains a  
78 dense vascular network and vascular sinuses creating the perivascular region, which provides a

79 niche where B cells are known to develop and reside (33). During aging, vascular density decreases  
80 in many tissues due to impaired angiogenesis caused by EC dysfunction. Vascular  
81 “hyperpermeability” also increases with age, via changes in ECs lining the blood vessel wall,  
82 disrupting the blood-BM barrier (34-36). The role of the vasculature and regulation of vessel  
83 permeability in hematopoiesis, especially in B cell development, remains unknown.

84 To understand how changes in bone homeostasis may affect immune cell development, our  
85 laboratories utilized *Dmp1-Cre;Vhl* conditional knockout mice (*Vhl*CKO), in which *Vhl* is deleted  
86 primarily in late OBs and OCYs. In the *Vhl*CKO bones, the number of hematopoietic cells is  
87 severely reduced, and B cell development is stunted (37). Here, we provide evidence for molecular,  
88 cellular and structural changes in the *Vhl*CKO BM niche that adversely affect B cell development  
89 in a cell-extrinsic manner, such as reduction in key niche cells, decreased production of B cell  
90 supporting cytokines, and structural changes in the BM vasculature. These studies reveal novel  
91 molecular mechanisms by which *Vhl* deletion in *Dmp1*-expressing cells affect B cell niches.

92

93

## 94 MATERIALS AND METHODS

### 95 Study design

96 A G\*Power statistical (38) power analysis ( $\alpha=0.05$  and power of 0.95) based on B cell  
97 developmental data and BM cellularity determined that a minimum of  $n=7$  mice per group was  
98 needed for our studies. The total sample size for each experiment was  $>7$  performed in three  
99 independent experiments. Age-matched mice of both sexes *Vhlc*KO and control mice (C57BL/6  
100 wild type and *Vhl*-floxed (*Vhl*<sup>fl/fl</sup>, *Dmp1-Cre*-negative mice) were used and no sex-specific  
101 differences in B cell development or other relevant characteristics to our studies were detected.  
102 Student's t-test and nonparametric Bonferroni-corrected Mann-Whitney U-test was used to test  
103 differences between mean and median values with Graph-Pad Prism and were considered  
104 significant if  $p<0.05$ .

105

### 106 Experimental Animals

107 Mice on the C57Bl/6 background were used. B6N.FVB-Tg1Jqfe/BwdJ (*Dmp1-Cre*) (39)  
108 and B6.129S4(C)-Vhl tm1Jae/ J (*Vhl*<sup>fl/fl</sup>) (40) were purchased from The Jackson Laboratory. These  
109 two lines of mice were crossed to generate *Vhl* conditional knockouts in *Dmp1*-expressing cells  
110 (*Vhlc*KO). Genotyping was confirmed following protocols from Jackson Laboratory for JAX  
111 Stock #021047 and #012933. Mice were housed under specific pathogen-free conditions in the  
112 University of California, Merced's vivarium with autoclaved feed and water, and sterile  
113 microisolator cages. The University of California Merced Institutional Animal Care and Use  
114 Committee approved all animal work.

115

116

## 117 **Bone marrow transplantation**

118 Recipient mice were 10 weeks of age at the time of transplantation. Whole bone marrow WT  
119 (CD45.1+) donor cells ( $1 \times 10^6$ ) were injected retro-orbitally into  
120 lethally irradiated (1000 rads using a Cesium-137 source, JL Shepherd and Associates, San  
121 Fernando, CA, USA) recipient *VhlcKO* (CD45.2+) mice under isoflurane anesthesia. Reciprocal  
122 *VhlcKO*→WT chimeras were also prepared. Animals were supplemented with neomycin in the  
123 drinking water for 14 days post-transplant as described (41).

124

## 125 **Sample Collection: Bone Marrow, Peripheral Blood, Spleen and Serum**

### 126 *Bone marrow collection*

127 Mice were euthanized by the inhalation of carbon dioxide followed by cervical dislocation.  
128 Femurs and tibias were dissected, and muscles were removed. To release the BM, bones were  
129 crushed with a mortar and pestle in M199+ (M199 with 2% FBS). BM cells were collected into  
130 15mL conical tubes after being rinsed away from bone chips with M199+, resuspended by  
131 trituration, filtered through 70-micron nylon mesh into a 50 mL conical tube, and centrifuged for  
132 5 mins at 1500 rpm and at 4°C. Cell pellets were resuspended and treated with ACK lysis buffer  
133 to remove erythrocytes. Cells treated with ACK were washed and resuspended in M199+. Cell  
134 counts were obtained using a hemocytometer and Trypan Blue staining to exclude dead cells.

135 To collect BM serum, femurs were cleaned of any muscle tissue and the epiphyses were  
136 cut off and discarded. The bone shaft was then placed into a 0.2 mL tube in which a hole was  
137 introduced using a needle. Thirty  $\mu$ L of 1x phosphate buffered saline (PBS) was placed on the top  
138 end of the bone shaft, using a 25g needle, and then the tube containing the bone was placed into a

139 1.5 ml microcentrifuge tube and centrifuged for 30 seconds at 15,000rpm. Serum supernatant was  
140 collected and stored at -80C until analysis.

#### 141 *Peripheral blood collection*

142 Mice were heated under a heat lamp to increase blood circulation and then restrained.  
143 Blood collection was performed via tail bleeds by making an incision with a scalpel blade over the  
144 ventral tail vein. No more than ten drops were collected (<0.5 mL) in a 1.5 ml Eppendorf tube with  
145 50 uL of heparin. To obtain blood serum, blood was collected in 1.5 ml tubes without heparin and  
146 allowed to clot for 30 minutes at room temperature. The samples were then centrifuged for 10  
147 minutes at 4000 rpm at 4°C. Blood serum was collected and stored at -80°C until the day of  
148 analysis.

#### 149 *Spleen cell collection*

150 Dissected spleens were processed and mashed in 1 mL of ACK lysis buffer in a petri dish  
151 for no more than one minute. Five mL of M199+ were added into the dish to dilute the ACK lysis  
152 buffer and to stop red cell lysis. Spleen cells were aspirated into a 5mL syringe to create single cell  
153 suspensions by passing the cells through the syringe several times then filtering through a 70-  
154 micron nylon mesh into a 15 mL conical tube. Cells were centrifuged at 2000 rpm at 4°C for 3  
155 minutes. Cell pellets were finger vortexed and resuspended with 5 mL of M199+. Live cell counts  
156 were determined using a hemocytometer and Trypan Blue staining.

157

#### 158 **Quantification of cytokines**

159 Cytokine measurements were performed using a customized bead-based multiplex (13-  
160 LEGENDplex assay) from Biolegend, Inc. with the analytes IL-3, IL-5, IL-6, IL-7, IL-15, IL-34,  
161 M-CSF, TPO, GM-CSF, LIF, EPO, CXCL12, SCF for the analysis of BM serum and peripheral



162 blood serum of *VhlcKO* and control mice. Concentrations of cytokines were determined from  
163 samples following manufacturer's instructions and software.

164

### 165 **Flow cytometry analysis and antibodies**

166 Cells were stained for flow cytometry and included a pre-incubation step with  
167 unconjugated anti-CD16/32 (clone 93) to block Fc receptors as previously described (41, 42).  
168 Samples were stained with antibodies listed in **Supplemental Table 1**. For viability staining, DAPI  
169 or PI was used. Single color stains were used for setting compensations and gates were determined  
170 with fluorescent-minus one controls, isotype-matched antibody controls, or historical controls.  
171 Intracellular staining of Ki67 was performed using the eBioscience™ Foxp3 / Transcription Factor  
172 Staining Buffer Set following the manufacturer's instructions. Apoptosis staining was performed  
173 using Biolegend Annexin V Apoptosis Detection Kit with 7AAD. Flow cytometry data was  
174 acquired on the BD LSR II. The data was analyzed using FlowJo Software version 10.7.1.

175

### 176 **Preparation of long bones for imaging**

177 To label blood vessels, mice were injected with fluorescent antibodies (**Supplemental**  
178 **Table 1**) through the retro-orbital venous sinus. After 20 minutes of incubation, intracardial  
179 perfusion was performed with 1X PBS following by cold and fresh 4% paraformaldehyde (PFA).  
180 Subsequently, femurs were harvested and fixed in the 4% PFA for 30 minutes, at 4° C. The bones  
181 were then washed with 1X PBS, immersed in 30% sucrose for 1 hour, frozen in optimal cutting  
182 temperature (OCT) compound and kept at – 80° C. Samples were shaved using a cryostat (LEICA  
183 CM1860) equipped with a high-profile blade (Leica; 3802121).

184 To optically clear long bones, a modified uDISCO clearing protocol was used (43). After  
185 intracardial perfusion as described above, long bones were immersed in 4% PFA overnight and  
186 put through a series of *tert*-butanol dehydration steps at 30% (4 hours), 50% (4 hours), 70%  
187 (overnight), 80% (4 hours), 90% (4 hours), and 100% (overnight). Next, long bones were incubated  
188 in dichloromethane (DCM) for 40 minutes and then placed in Benzyl Alcohol Benzyl Benzoate -  
189 DL-alpha-tocopherol (BABB-D4) for 3-4 hours. BABB-D4 is prepared by mixing Benzyl Alcohol  
190 + Benzyl Benzoate at the ratio of 1:2, adding diphenyl ether (DPE) to the BABB solution (1:4)  
191 and ultimately DL-alpha-tocopherol (Vitamin E) with the ratio of 1:25 to decrease fluorescence  
192 quenching. Cleared femurs were mounted in a custom glass chamber filled with BABB-D4 and  
193 sealed with solvent-resistant silicone gel (DOWSIL™ 730) (43).

194

## 195 **Two-photon microscopy**

196 Imaging was performed with a custom-built two-photon video-rate microscope (Bliq  
197 Photonics) equipped with two femtosecond lasers (Spectra Physics; Insight X3, Spectra Physics;  
198 MaiTai eHP DS). During intravital imaging, the Spectra Physics Insight X3 and Maitai laser  
199 wavelengths were tuned to 840 nm and 1040 nm, respectively, and for ex vivo imaging only the  
200 Insight X3 was tuned to 1220 nm. Three fluorescent channels were acquired (520-535 nm, 590-  
201 636 nm, and 679-741 nm). For all two-photon imaging, a 25x water immersion objective  
202 (Olympus; XLPLN25XWMP2) with 1.05 numerical aperture was used to image a 317 μm by 159  
203 μm field of view. Videos were recorded at 30 frames per second and images were generated by  
204 averaging of 30 frames from the live video mode.

205 For in vivo imaging of calvarial bone marrow, mice were anesthetized with isoflurane (3-  
206 4% induction, 1.5% maintenance at 1L/min) and the top of the head shaved. The skin was cleaned

207 with 70% alcohol wipes before surgery. The mouse was placed on a heating pad and secured in a  
208 custom head mount. An incision was made along the sagittal and lambda suture of the skull and  
209 the skin retracted to expose the calvarial bone as previously described (11, 44). The secured mouse  
210 was then placed on the microscope stage for two-photon microscopy(11, 44). In order to measure  
211 BM blood vessel permeability, leakage and flow velocity in the calvaria BM during in vivo  
212 imaging, 70 kDa Rhodamine-B-Dextran (ThermoFisher; D1841) was injected retro-orbitally while  
213 the mouse was on the stage.

214 For ex vivo imaging, optically cleared long bones were mounted in a chamber sealed with  
215 solvent-resistant silicone gel and shaved long bones were mounted on a wet sponge to prevent the  
216 sample from drying during imaging. Slides were imaged with similar acquisitions settings as the  
217 in vivo imaging.

218

### 219 **Image quantification**

220 For in vivo image analysis, image processing and permeability/leakage measurements were  
221 performed with Fiji (ImageJ 1.53k) and BM blood flow velocity was quantified with custom scripts  
222 in MATLAB (2020a). To measure permeability in the calvaria, live two-photon microscopy video  
223 was recorded for the first 30 seconds after Rhodamine B Dextran was injected. The blood vessel  
224 permeability was calculated based on the change in fluorescence intensity outside of blood vessels  
225 over time as previously described (45, 46). For leakage measurements, z-stacks (2  $\mu\text{m}$  step size)  
226 were recorded randomly around the calvarium BM 10 minutes after injection. Leakage values were  
227 calculated by dividing the fluorescence intensity of the perivascular space adjacent to a vessel by  
228 the fluorescence intensity inside the blood vessel. Representative examples of BM leakage were  
229 generated by taking maximum intensity projections (MIPs) of BM regions with image

230 contrast/enhancement applied. Blood flow velocity was calculated by recording 30 second videos  
231 of blood flow in the BM calvaria and then utilizing the Line Scanning Particle Image Velocimetry  
232 (LSPIV) method implemented in a custom MATLAB script to calculate blood flow velocity as  
233 previously described (47, 48). ImageJ (ImageJ 1.53k) was used to adjust video and image contrast  
234 for figure presentation.

235         To generate a depth-dependent profile of vessel diameter in long bones, measurements  
236 were taken at 0-30  $\mu\text{m}$  (shallow BM), 75-105  $\mu\text{m}$  (middle BM), and 150-180  $\mu\text{m}$  (deep BM) below  
237 the endosteum. To measure vascular density, image brightness/contrast was first adjusted in Fiji  
238 (ImageJ 1.53k) and then images were converted to binary. Next, noise reduction was performed  
239 via Despeckle, and binary Fill Hole was applied. Finally, using analytical coding developed in  
240 Python (3.7.6), the ratio of the total blood vessel pixels to total BM pixels was determined for BM  
241 vessel density measurements.

242 **RESULTS**

243 ***Vhl* deletion in *Dmp1*-expressing cells dysregulates hematopoiesis**

244 Long bones in *VhlcKO* mice display abnormally high bone mass and density and the BM  
245 cavity is severely occluded with bone, accompanied by stunted B cell development (37) (**Figure**  
246 **1A**). Consistent with this, *VhlcKO* mice displayed splenomegaly, consistent with extramedullary  
247 hematopoiesis (**Supplemental Figure 1A-E**). *VhlcKO* mice exhibit reduced BM cellularity  
248 compared to controls (**Figure 1B**) and analysis of specific hematopoietic cell lineages revealed a  
249 decrease in B cells, no change in T cell frequency, and an increase in monocytes and granulocytes  
250 in 6-week-old, 10-week-old and 6-month-old mice (**Figure 1C-D**). Similarly, lineage analysis in  
251 the spleen at 10 weeks revealed a decrease in B cells, no change in T cells, and an increase in  
252 granulocytes that became more prominent as mice aged to 6-months. Monocytes in the *VhlcKO*  
253 spleen at 6-weeks-old were slightly reduced, similar to controls at 10-weeks-old, and were  
254 increased at 6-months-old (**Supplemental Figure 1E**). Peripheral blood of the *VhlcKO* mice  
255 showed decreased B cells at all ages examined, whereas monocytes were increased at 10-weeks-  
256 old, and granulocytes at 6-months-old only (**Supplemental Figure 1F**). Furthermore, we observed  
257 greater proportions of monocytes and granulocytes and an overall reduction in the absolute  
258 numbers of all hematopoietic lineages in the BM of *VhlcKO* mice (**Table 1**).

259

260 **Increased frequencies of hematopoietic progenitor cells in the *VhlcKO* BM**

261 To further investigate if the defect in hematopoiesis occurred upstream of lineage-  
262 committed cells, we analyzed the hematopoietic progenitor compartments in the BM of *VhlcKO*  
263 mice. Long-term hematopoietic stem cells (LT-HSCs: LSK, CD150<sup>+</sup> CD48<sup>-</sup>), short term  
264 hematopoietic stem cells (ST-HSCs: LSK, CD150<sup>-</sup>, CD48<sup>-</sup>), multipotent progenitors (MPP2:

265 LSK, CD150+, CD48+; MPP3: LSK, CD150-, CD48+; and MPP4: LSK, CD150-, Flk2+,  
266 CD48+), and common lymphoid progenitors (CLPs: Lineage-, CD127+, cKIT<sup>int</sup>, Sca1<sup>int</sup>) from  
267 *VhlcKO* and control mice were quantified using flow cytometry (**Figure 2A, B**). The results  
268 showed an increase in the frequency in LT-HSCs, ST-HSCs, MPP2, MPP3, and CLPs at 6-weeks,  
269 10-weeks and 6-months-old (**Figure 2C**). MPPs are heterogeneous with different lineage-biased  
270 potential. MPP2/3 are myeloid-biased while MPP4 are lymphoid-primed (49, 50). In our results,  
271 MPP4 frequency was increased starting at 10-weeks-old (**Figure 2C**). These results show that  
272 deletion of *Vhl* in *Dmp1*-expressing cells increases progenitor frequencies and indicates that  
273 downstream differentiation of B cells may be blocked. However, examination of MPP4 absolute  
274 numbers showed decreased MPP4s in 6-week-old *VhlcKO*, an increase at 10-weeks-old, and  
275 numbers similar to controls at 6-months old. In 10-week-old *VhlcKO* mice, the absolute numbers  
276 of LT-HSCs and MPP3 were increased, whereas at 6-months-old, LT-HSCs and CLPs were  
277 decreased (**Figure 2D**).

278

### 279 ***Vhl* deletion in *Dmp1*-expressing cells dysregulates B cell development in the BM**

280 To further explore the effects of *Vhl* deletion in OBs and OCYs on B cell development and  
281 to identify at which stage B cell development was stunted in the BM, we determined the  
282 frequencies of Hardy Fractions A-F (**Figure 3A, Supplemental Figure 2**) using flow cytometry  
283 (1, 51). A decrease in frequencies of Fractions B-C and Fraction F was observed as early as 6-  
284 weeks-old, and across Fractions B through Fractions F was observed at 10-weeks-old and 6-  
285 months-old (**Figure 3B**). An overall decrease in the absolute numbers of B cells across all  
286 developmental stages was observed at all three ages (**Figure 3C**). *VhlcKO* mice regardless of age  
287 displayed increased CLPs, retained normal frequency of Fraction A, whereas later Fractions were

288 all decreased (**Figure 3B**). These results indicate an incomplete block in B cell development that  
289 starts at Fractions B-C in *VhlcKO* mice.

290

291 **Reciprocal bone marrow transplantation studies reveal a cell-extrinsic effect of the *VhlcKO***  
292 **microenvironment on B cell development**

293 We expected the cause of the B cell defect to lie within the non-hematopoietic cells, since  
294 *Dmp1* is not expressed in hematopoietic cells. To definitively determine if the effects of *Vhl*  
295 deficiency on B lymphopoiesis were due to changes in the non-hematopoietic microenvironment  
296 within the bone, we performed whole BM transplants from WT (CD45.1+) donors into lethally  
297 irradiated *VhlcKO* (CD45.2+) recipients (WT→*VhlcKO* chimeras (**Figure 4A**)). Control WT  
298 (CD45.1+)→WT (CD45.2+) chimeras were also prepared. Donor hematopoietic chimerism was  
299 similar in controls and chimeras (**Figure 4B**). Analysis 16 weeks post-transplant showed a  
300 significant reduction in BM cellularity (**Figure 4C**) and an increase in granulocytes and  
301 monocytes, and a decrease in B cells in the WT→*VhlcKO* mice (**Figure 4D**). Analysis of B cells  
302 revealed a decrease at Fractions A through Fraction F in both frequency and absolute numbers  
303 (**Figure 4E, F**), similar to that observed in non-transplanted *VhlcKO* mice (**Figure 3**). In contrast,  
304 overall hematopoiesis, including B cell development, was normal in the *VhlcKO*→WT chimeras  
305 (**Supplemental Figure 3**). Since *Vhl* deletion in B cells can affect their function (52, 53), we  
306 confirmed that *Vhl* remained intact and was not erroneously deleted in B cells in our *VhlcKO* mice  
307 (**Supplemental Figure 4**). These results confirm a cell-extrinsic effect of the non-hematopoietic  
308 *VhlcKO* BM microenvironment on hematopoiesis.

309

310 ***VhlcKO* mice display patterns of reduced B cell proliferation and increased B cell apoptosis**  
311 **in the BM**

312 We hypothesized that the observed reduction of B cells was due to increased apoptosis and  
313 diminished B cell proliferation in the BM. To test this, B cells were stained with Annexin V and  
314 7AAD to identify cells that were live, in early stage apoptosis or late stage apoptosis (**Figure 5A,**  
315 **left panels**). Normally, apoptosis is the most extensive in Fraction A (pre-pro-B cells) amongst  
316 the B cell fractions (54). The frequencies of *VhlcKO* Fraction A cells in live, early and late  
317 apoptosis stages was comparable to controls at 6- and 10-weeks-old. However, at 6-months old,  
318 Fraction A comprised fewer live cells and more late apoptotic cells compared to controls.  
319 Apoptosis in Fraction B-C in *VhlcKO*s was similar to controls at 6-weeks-old, but then displayed  
320 an increase in late apoptosis at 10-weeks-old and 6-months-old (**Figure 5B**). A reduction of live  
321 Fraction B-C cells was also observed at 6-months old (**Figure 5B**). No differences in the stages  
322 of apoptosis were observed between controls and *VhlcKO*s for Fractions D, E and F  
323 (**Supplemental Figure 5**).

324 B cell development leads to the assembly and signaling of the B cell antigen receptor  
325 (BCR). CD43+ Fraction A-C (pre-pro-B and pro-B cells) normally have higher proliferation rates  
326 compared to CD43- Fraction D-E (Pre-B cells and immature B cells) (5, 55). Proliferation is halted  
327 at Fraction D (small pre-B cell) to allow light (L) chain gene rearrangement, subsequently  
328 expressing a complete IgM surface molecule (Fraction E) (5, 56). Cell cycle analysis was  
329 performed using Ki67 and DAPI staining (**Figure 5A, right panels**). At 6-weeks-old, there were  
330 no differences in the distribution of cells in G0 (quiescent), G1, or S/G2/M phases between  
331 *VhlcKO* and control mice. However, at 10-weeks-old and 6-months-old, Fractions B-C contained  
332 a reduced percentage of cells in G1 and S/G2/M cell cycle phases, and an increased percentage in



333 G0 (**Figure 5C**). This indicates a reduced ability of early B cell progenitors to proliferate in a *Vhl*-  
334 deficient microenvironment. No difference in proliferation of Fractions D-F was observed at any  
335 age examined, with the exception of a slight (yet statistically significant) reduction of the *Vhl*cKO  
336 Fraction F cells in G0 and increase in G1 at 6-months-old (**Supplemental Figure 6**).

337 B cell development at each stage requires specific signaling molecules from a variety of  
338 niche cells (5, 57). To examine for changes in the distribution of niche cells in *Vhl*cKO bones,  
339 control and *Vhl*cKO long bones were digested and stained for stromal cell populations by flow  
340 cytometry (**Supplemental Figure 7**) (58, 59). Using this approach, the *Vhl*cKO mice displayed  
341 reduced frequency of ECs, while MSCs, and OBs remained similar to controls. To further explore  
342 the dysregulated niche, BM serum was analyzed for levels of CXCL12 and SCF, which are critical  
343 for B cell development (1, 24, 28, 29). CXCL12 levels were reduced in the *Vhl*cKO BM serum,  
344 while SCF levels were unaffected (**Figure 5D**). This suggested that increased apoptosis and  
345 reduced proliferation of Fraction B-C cells are caused by reduced CXCL12 levels and lack of ECs  
346 in the *Vhl*cKO BM.

347

#### 348 **Evidence for elevated oxygen levels in local niches in the *Vhl*cKO bone marrow**

349 Hypoxic niches in the BM microenvironment are crucial for hematopoiesis development.  
350 Dynamic regulation of HIF-1 $\alpha$  levels are required for normal B cell development such that HIF  
351 activity is high in pro-B and pre-B cells and decreases in the immature B cell stage in the BM (60).  
352 In wild type mice, studies using the hypoxic marker pimonidazole (PIM) revealed that HSCs in  
353 the BM stain positively with PIM, indicating a hypoxic niche (61). To evaluate hypoxia in distinct  
354 B cell developmental stages, *Vhl*cKO and control mice were injected with PBS or 120 mg/kg PIM.  
355 PIM staining of LSKs in the BM stained positively for PIM, as previously reported by other groups

356 **(Figure 6A)**. CD45<sup>+</sup> B220<sup>+</sup> cells (which include all Hardy Fractions, in addition to other  
357 hematopoietic progenitors, natural killer cells, dendritic cells and T cells (62-66)) displayed  
358 positive, yet less intense staining with PIM in both control or *VhlcKO* mice **(Figure 6A)**.  
359 Normalization of PIM staining on LSK HSCs and CD45<sup>+</sup> B220<sup>+</sup> cells in four *VhlcKO* mice to the  
360 mean staining in controls showed no statistically significant differences **(Figure 6B)**. However,  
361 examination of PIM staining in distinct Hardy Fractions revealed that in general, the early B cell  
362 progenitors (Fraction A) stain with PIM at a higher level than the mature B cells (Fraction F).  
363 Notably, *VhlcKO* mice displayed diminished intensity of PIM staining compared to control mice  
364 across all B cell fractions **(Figure 6C, Table 2)**. This reveals that similar to LSKs, Fraction A cells  
365 might reside in a hypoxic niche, and as they mature they move away to a less hypoxic niche.  
366 Moreover, these data indicate that B cells in the *VhlcKO* BM may experience higher oxygen levels  
367 as compared to control mice in their local niches.

368

### 369 **Increased bone marrow blood vessel diameter and density in *VhlcKO* microenvironments**

370 To more precisely examine the changes in the microenvironment of *VhlcKO* mice, we  
371 imaged femurs that were shaved to remove cortical bone (for analysis of the metaphysis) or  
372 optically cleared with a modified uDISCO protocol (for analysis of the fully intact diaphysis)  
373 **(Supplemental Videos 1-2)** (43). We measured the vessel diameter and frequency in the cleared  
374 long bones and found that regardless of their position in the BM, blood vessels in *VhlcKO* mice  
375 were significantly larger than the control group **(Figure 7A-C)** while generally no difference was  
376 observed in the vessel frequency **(Supplemental Figure 8A)**. Bone and BM vessel density  
377 measurements in both the metaphysis and diaphysis revealed that in *VhlcKO*, blood vessels occupy  
378 a larger volume than controls **(Figure 7D-F, Supplemental Figure 8B-C)**. Furthermore, we

379 observed an apparent decrease in endosteal lining arterioles in the diaphysis of 6-month-old  
380 *VhlcKO* femurs compared to controls (**Supplemental Figure 8D**). Taken together, these data  
381 reveal a striking alteration in the overall architecture of the BM vascular network in *VhlcKO* mice.

382

### 383 ***VhlcKO* bone marrow blood vessels display increased permeability**

384 While it has been shown that the bone and vascular system undergoes significant  
385 remodeling in *VhlcKO* mice, there has been a lack of information regarding potential functional  
386 changes to BM blood vessels. To examine changes to the BM vasculature system which could  
387 negatively impact B cell development, we sought to quantify changes to the vascular permeability,  
388 leakage and blood flow velocity via intravital two-photon microscopy of the calvaria. Vessel  
389 permeability reflects the rate at which small molecules exit blood vessels and fill the surrounding  
390 perivascular space, whereas leakage is the ratio of fluorescent dye in the perivascular space and  
391 vascular lumen after reaching equilibrium. Blood vessel leakage and permeability was calculated  
392 by administering Rhodamine B Dextran (70kDa) via a retro-orbital injection. We found that  
393 *VhlcKO* mice displayed greater vascular leakage overall, and that vascular leakage increased in  
394 both control and *VhlcKO* mice with age (**Figure 8A-B, Supplemental Videos 3-8**). Similarly, we  
395 observed an increase in vascular permeability in *VhlcKO* mice, which significantly increased with  
396 age (**Figure 8C, Supplemental Video 9-10**). We observed a decrease in blood flow velocity in  
397 *VhlcKO* mice compared to controls for 6-week-old and 10-week-old mice (**Figure 8D**). Lastly, we  
398 observed an age-related reduction in blood flow in both *VhlcKO* and control mice (**Figure 8D**),  
399 which is consistent with previously published changes in BM vascular flow rate with age (67).

400

401 **DISCUSSION**

402 VHL plays an important role regulating HIF expression, and disruption of *Vhl* in bone cells  
403 leads to improper bone homeostasis (7, 8, 19, 37). *Vhl* deletion in osteochondral progenitor cells  
404 and osteocalcin-positive OBs leads to an increase in bone mass through an increase in OB number  
405 (7, 19). Furthermore, disrupting VHL in OBs induces expression of  $\beta$ -catenin, revealing that  
406 VHL/HIF pathway promotes bone formation through the Wnt pathway (7, 20, 21). Altogether,  
407 these studies of *Vhl* deletion in osteolineage cells have not examined the cell-extrinsic effects of  
408 these changes on the immune cells residing in the BM. In this report, we establish that deletion of  
409 *Vhl* in late OBs and OCYs results in cell-extrinsic changes that does not support full development  
410 and survival of B cells.

411 BM stromal cells include a variety of non-hematopoietic cells, such MSCs and OBs, which  
412 are the precursors of mature mineralized OCYs, and ECs. All of these cells support B cell  
413 development (1, 28, 31, 32). In our study, using flow cytometry after bone digest, we found that  
414 the distribution of the stromal cell populations was not affected in the *Vhl*cKO, with the exception  
415 of CD31+ ECs, which were reduced. This was surprising due to the increase in vessel volume and  
416 number that was observed in the ex vivo imaging of *Vhl*cKO long bones. The differences in the  
417 results may reflect a limitation in the bone digestion protocol that is used for analyzing BMSCs by  
418 flow cytometry. It is widely accepted that with this protocol, hematopoietic cells, likely from the  
419 bone marrow, are still evident after rinsing of the bone chips and collagenase digestion. Therefore,  
420 we cannot determine if the ECs examined are residual BM ECs or resident bone ECs. In addition,  
421 the increased density of *Vhl*cKO bone makes it challenging to digest completely and all of the ECs  
422 from the bone may not be released. Given this caveat, we believe that our imaging results are more  
423 accurate than the flow cytometry, and the imaging results suggest that there is an increase in bone  
424 ECs, which is consistent with previous studies in *Osx-Cre;Vhl<sup>fl/fl</sup>* mice where endomucin staining

425 showed that *Vhl* deletion increased bone vasculature with dilated blood vessels (37). We also  
426 observed larger vessels in the BM across all ages and an increase in BM blood volume. These  
427 changes, along with the observed decrease in endosteal arterioles in the long bones, suggests that  
428 oxygenation of the *VhlcKO* marrow may be higher than normal, which may play a role in  
429 dysregulation of B cell development. Future studies will be needed to clarify this and to identify  
430 other changes in specific types or locations of blood vessels in the *VhlcKO* model.

431         Given the connection between *Vhl* and hypoxia response, it was interesting that EPO levels  
432 were high in the BM serum of the *VhlcKO* mice. This has been confirmed in other studies, where  
433 deletion of *Vhl* at the mature OB stage using the *Osx*-Cre and *Ocn*-Cre (targeting osteoprogenitors)  
434 (8, 19, 20) and at the late OB/OCY stage using *Dmp*-Cre increased bone mass and angiogenesis,  
435 likely through HIF1 $\alpha$ -regulated expression of VEGF and EPO. If the elevated EPO levels directly  
436 affect B cell development in the *VhlcKO* BM has not yet been verified. However, it has been  
437 reported that ECs in the BM suppress levels of CXCL12 expression in response to increased EPO  
438 levels (68). We also observed decreased CXCL12 in the BM sera of *VhlcKO* mice. CXCL12 is  
439 required for proper development and retention of B cells in the BM (32, 69). This suggests that  
440 altered vascular components in the *VhlcKO* bone and BM microenvironments impair B cell  
441 development possibly through the effects of EPO on EC function.

442         Permeability of the BM vasculature in the *VhlcKO* mice was also compromised. We found  
443 an increased vascular leakage and permeability in the *VhlcKO* BM compared to controls regardless  
444 of age. In addition, vascular permeability appeared to increase with age, with the highest vascular  
445 permeability and leakage being observed in 6-month-old *VhlcKO* mice when compared with 6-  
446 week-old mice. Interestingly, it was observed that vascular blood flow velocity decreased in 6-  
447 week-old and 10-week-old *VhlcKO* mice but was not affected in 6-month-old *VhlcKO* mice. An

448 increase in blood flow velocity would normally explain an increase in permeability and leakage,  
449 but that is not evident in our data. Instead, the more likely explanation is that the blood-bone  
450 marrow barrier is compromised, increasing the exposure of the BM to plasma components.

451 Deletion of *Vhl* in B cells stabilizes *Hif1 $\alpha$*  levels and affects mature B cell function by  
452 impairing cell proliferation, antibody class-switching, generation of high affinity antibodies,  
453 antibody responses, and impairs metabolic balance essential for naive B cell survival and  
454 development (52, 53, 70). Dynamic regulation of HIF-1 $\alpha$  levels was also found to be a crucial step  
455 in B cell development in the BM (60). Burrows et al. found decreased *Hif1 $\alpha$*  activity at the  
456 immature B cell stage in the BM and that HIF-1 $\alpha$  suppression was required for normal B cell  
457 development (60). This dynamic regulation of HIF-1 $\alpha$  activity during B cell development is  
458 consistent with our results, which revealed that Fraction A cells stain highly with PIM, and PIM  
459 staining was reduced as B cell development progressed to Fraction F. Together, our findings and  
460 that of Burrows et al. suggest that the earliest B cell stages (e.g. pre-pro B, Fraction A) might prefer  
461 a more hypoxic niche compared to the later B cell stages. We also found that the *VhlcKO* mice  
462 displayed lower intensity of PIM staining on B cells compared to controls, suggesting a hyperoxic  
463 state, which could also be deleterious for B cell development. Although *Vhl* is deleted in OBs  
464 and OCYs in our model, we cannot yet rule out if this deletion is artificially causing changes that  
465 would be found in a true hypoxic state through *Hif1* stabilization, when in fact the oxygenation of  
466 the BM of the *VhlcKO* is not altered. In addition, PIM cannot provide true quantification of  
467 dissolved oxygen concentration in tissue. PIM adduct staining results could reflect inadequate  
468 oxygen supply to the BM, faulty rates of intracellular oxygen consumption, or both. Direct in vivo  
469 measurement of oxygen tension using two-photon phosphorescence lifetime microscopy would  
470 help answer this question (11).

471 HSCs were increased in previous studies that showed that HSCs can maintain cell cycle  
472 quiescence and function through regulation of HIF-1 $\alpha$  levels (9). In our studies, we found that  
473 HSCs and upstream progenitors of B cells were increased in frequency. We found that the increase  
474 in progenitors is due to the inability to mature into B cells, but it remains unclear whether there is  
475 a shift from lymphoid to myeloid skewing. Some possible studies to sort out lineage bias would  
476 be through immune phenotyping analysis such as single cell sequencing to explore expression  
477 signatures (myeloid vs. lymphoid) to reveal lineage fate (49) or limiting dilution analysis and  
478 single cell transplantation as previously done by other groups to show the ratio of myeloid to  
479 lymphoid cell output (71-74).

480 The information generated in this study helps define the role of *Vhl* and altered bone  
481 homeostasis on immune cell development. Our results suggest the following working model of  
482 the interactions in the BM microenvironment that controls B cell development (**Figure 9**): *Vhl* in  
483 OCYs and late OBs play a significant role in the BM microenvironment, indirectly regulating B  
484 cell development through a decrease in CXCL12, an increase in EPO, increased vasculature and  
485 vascular permeability. However, oxygen tension in the niche of early stage B cell fractions is yet  
486 to be determined. Our results demonstrate the significant changes of the physical niche in *Vhl*CKO  
487 mice and their effects on B cell development. Whether the physical space, niche cells, or molecular  
488 signals all play a direct or indirect role on B cell development remains to be explored and defined,  
489 with the possibility that these events are completely independent of each other. The results of this  
490 work could contribute to the development of new therapies or new targets for exogenous CXCL12  
491 and EPO antagonists, to preserve and improve bone marrow function during microenvironmental  
492 niche changes or stress.

493

494 **ACKNOWLEDGMENTS**

495 We thank the staff of the Department of Animal Research Services (DARS) and the Stem Cell  
496 Instrumentation Foundry (SCIF) at UC Merced for the excellent animal care and technical support.

497 We also acknowledge Hawa Padmore and William Pratcher for their early contributions to  
498 protocol setup. The authors also thank the staff of the Health Sciences Research Institute (HSRI)

499 at UC Merced for their administrative support. This work was funded by the University of  
500 California, NIH grants R15 AI154245-01 (J.O.M. and J.A.S.) and NIH F31 AI154815 (B.C.), and

501 through support of the NSF-CREST: Center for Cellular and Biomolecular Machines at the  
502 University of California, Merced (NSF-HRD-1547848; N.A., C.B., and J.A.S.).

503



504 **REFERENCES**

- 505
- 506 1. T. Nagasawa, Microenvironmental niches in the bone marrow required for B-cell development.  
507 *Nat Rev Immunol* **6**, 107-116 (2006).
  - 508 2. J. O. Manilay, M. Zouali, Tight relationships between B lymphocytes and the skeletal system.  
509 *Trends Mol Med* **20**, 405-412 (2014).
  - 510 3. C. Panaroni, J. Y. Wu, Interactions between B lymphocytes and the osteoblast lineage in bone  
511 marrow. *Calcif Tissue Int* **93**, 261-268 (2013).
  - 512 4. M. Aurrand-Lions, S. J. C. Mancini, Murine Bone Marrow Niches from Hematopoietic Stem  
513 Cells to B Cells. *Int J Mol Sci* **19** (2018).
  - 514 5. R. Carsetti, The development of B cells in the bone marrow is controlled by the balance between  
515 cell-autonomous mechanisms and signals from the microenvironment. *J Exp Med* **191**, 5-8  
516 (2000).
  - 517 6. V. H. Haase, The VHL tumor suppressor: master regulator of HIF. *Current pharmaceutical*  
518 *design* **15**, 3895-3903 (2009).
  - 519 7. Y. Wang *et al.*, The hypoxia-inducible factor alpha pathway couples angiogenesis to osteogenesis  
520 during skeletal development. *J Clin Invest* **117**, 1616-1626 (2007).
  - 521 8. N. Dirckx *et al.*, Vhl deletion in osteoblasts boosts cellular glycolysis and improves global  
522 glucose metabolism. *J Clin Invest* **128**, 1087-1105 (2018).
  - 523 9. K. Takubo *et al.*, Regulation of the HIF-1alpha level is essential for hematopoietic stem cells.  
524 *Cell Stem Cell* **7**, 391-402 (2010).
  - 525 10. H. L. Bader, T. Hsu, Systemic VHL gene functions and the VHL disease. *FEBS Lett* **586**, 1562-  
526 1569 (2012).
  - 527 11. J. A. Spencer *et al.*, Direct measurement of local oxygen concentration in the bone marrow of live  
528 animals. *Nature* **508**, 269-273 (2014).
  - 529 12. M. Hirao *et al.*, Oxygen tension is an important mediator of the transformation of osteoblasts to  
530 osteocytes. *J Bone Miner Metab* **25**, 266-276 (2007).
  - 531 13. H. J. Knowles, Hypoxic regulation of osteoclast differentiation and bone resorption activity.  
532 *Hypoxia (Auckl)* **3**, 73-82 (2015).
  - 533 14. D. E. Komatsu, M. Hadjiargyrou, Activation of the transcription factor HIF-1 and its target genes,  
534 VEGF, HO-1, iNOS, during fracture repair. *Bone* **34**, 680-688 (2004).
  - 535 15. A. Danis, [Mechanism of bone lengthening by the Ilizarov technique]. *Bull Mem Acad R Med*  
536 *Belg* **156**, 107-112 (2001).
  - 537 16. Q. Zhao *et al.*, Mice with increased angiogenesis and osteogenesis due to conditional activation  
538 of HIF pathway in osteoblasts are protected from ovariectomy induced bone loss. *Bone* **50**, 763-  
539 770 (2012).
  - 540 17. T. Tando *et al.*, Hif1alpha is required for osteoclast activation and bone loss in male osteoporosis.  
541 *Biochem Biophys Res Commun* **470**, 391-396 (2016).
  - 542 18. Y. Miyauchi *et al.*, HIF1alpha is required for osteoclast activation by estrogen deficiency in  
543 postmenopausal osteoporosis. *Proc Natl Acad Sci U S A* **110**, 16568-16573 (2013).
  - 544 19. T. Weng *et al.*, Inactivation of Vhl in osteochondral progenitor cells causes high bone mass  
545 phenotype and protects against age-related bone loss in adult mice. *J Bone Miner Res* **29**, 820-829  
546 (2014).
  - 547 20. G. L. Zuo *et al.*, Activation of HIFa pathway in mature osteoblasts disrupts the integrity of the  
548 osteocyte/canalicular network. *PloS one* **10**, e0121266 (2015).
  - 549 21. C. Wan *et al.*, Activation of the hypoxia-inducible factor-1alpha pathway accelerates bone  
550 regeneration. *Proc Natl Acad Sci U S A* **105**, 686-691 (2008).
  - 551 22. W. C. Dougall *et al.*, RANK is essential for osteoclast and lymph node development. *Genes Dev*  
552 **13**, 2412-2424 (1999).
  - 553 23. E. Sitnicka *et al.*, Complementary signaling through flt3 and interleukin-7 receptor alpha is  
554 indispensable for fetal and adult B cell genesis. *J Exp Med* **198**, 1495-1506 (2003).

- 555 24. I. K. McNiece, K. E. Langley, K. M. Zsebo, The role of recombinant stem cell factor in early B  
556 cell development. Synergistic interaction with IL-7. *J Immunol* **146**, 3785-3790 (1991).
- 557 25. C. Waskow, S. Paul, C. Haller, M. Gassmann, H. R. Rodewald, Viable c-Kit(W/W) mutants  
558 reveal pivotal role for c-kit in the maintenance of lymphopoiesis. *Immunity* **17**, 277-288 (2002).
- 559 26. U. von Freeden-Jeffry *et al.*, Lymphopenia in interleukin (IL)-7 gene-deleted mice identifies IL-7  
560 as a nonredundant cytokine. *J Exp Med* **181**, 1519-1526 (1995).
- 561 27. S. Dias, H. Silva, Jr., A. Cumano, P. Vieira, Interleukin-7 is necessary to maintain the B cell  
562 potential in common lymphoid progenitors. *J Exp Med* **201**, 971-979 (2005).
- 563 28. T. Egawa *et al.*, The earliest stages of B cell development require a chemokine stromal cell-  
564 derived factor/pre-B cell growth-stimulating factor. *Immunity* **15**, 323-334 (2001).
- 565 29. T. Nagasawa *et al.*, Defects of B-cell lymphopoiesis and bone-marrow myelopoiesis in mice  
566 lacking the CXC chemokine PBSF/SDF-1. *Nature* **382**, 635-638 (1996).
- 567 30. Y. Y. Kong *et al.*, OPGL is a key regulator of osteoclastogenesis, lymphocyte development and  
568 lymph-node organogenesis. *Nature* **397**, 315-323 (1999).
- 569 31. A. C. Green *et al.*, The characterization of distinct populations of murine skeletal cells that have  
570 different roles in B lymphopoiesis. *Blood* 10.1182/blood.2020005865 (2021).
- 571 32. K. Tokoyoda, T. Egawa, T. Sugiyama, B. I. Choi, T. Nagasawa, Cellular niches controlling B  
572 lymphocyte behavior within bone marrow during development. *Immunity* **20**, 707-718 (2004).
- 573 33. A. Cariappa *et al.*, Perisinusoidal B cells in the bone marrow participate in T-independent  
574 responses to blood-borne microbes. *Immunity* **23**, 397-407 (2005).
- 575 34. J. A. Alberts B, Lewis J, et al., Blood Vessels and Endothelial Cells. *Molecular Biology of the*  
576 *Cell. 4th edition* (2002).
- 577 35. Z. Ungvari *et al.*, Endothelial dysfunction and angiogenesis impairment in the ageing vasculature.  
578 *Nat Rev Cardiol* **15**, 555-565 (2018).
- 579 36. R. Oakley, B. Tharakan, Vascular hyperpermeability and aging. *Aging Dis* **5**, 114-125 (2014).
- 580 37. G. G. Loots *et al.*, Vhl deficiency in osteocytes produces high bone mass and hematopoietic  
581 defects. *Bone* **116**, 307-314 (2018).
- 582 38. F. Faul, E. Erdfelder, A. G. Lang, A. Buchner, G\*Power 3: a flexible statistical power analysis  
583 program for the social, behavioral, and biomedical sciences. *Behav Res Methods* **39**, 175-191  
584 (2007).
- 585 39. Y. Lu *et al.*, DMP1-targeted Cre expression in odontoblasts and osteocytes. *J Dent Res* **86**, 320-  
586 325 (2007).
- 587 40. V. H. Haase, J. N. Glickman, M. Socolovsky, R. Jaenisch, Vascular tumors in livers with targeted  
588 inactivation of the von Hippel-Lindau tumor suppressor. *Proc Natl Acad Sci U S A* **98**, 1583-1588  
589 (2001).
- 590 41. C. J. Cain *et al.*, Absence of sclerostin adversely affects B-cell survival. *J Bone Miner Res* **27**,  
591 1451-1461 (2012).
- 592 42. D. M. Gravano, J. O. Manilay, Inhibition of proteolysis of Delta-like-1 does not promote or  
593 reduce T-cell developmental potential. *Immunol Cell Biol* **88**, 746-753 (2010).
- 594 43. C. Pan *et al.*, Shrinkage-mediated imaging of entire organs and organisms using uDISCO. *Nat*  
595 *Methods* **13**, 859-867 (2016).
- 596 44. D. A. Sipkins *et al.*, In vivo imaging of specialized bone marrow endothelial microdomains for  
597 tumour engraftment. *Nature* **435**, 969-973 (2005).
- 598 45. T. Itkin *et al.*, Distinct bone marrow blood vessels differentially regulate haematopoiesis. *Nature*  
599 **532**, 323-328 (2016).
- 600 46. Y. Jung *et al.*, Intravital Imaging of Mouse Bone Marrow: Hemodynamics and Vascular  
601 Permeability. *Methods Mol Biol* **1763**, 11-22 (2018).
- 602 47. T. N. Kim *et al.*, Line-scanning particle image velocimetry: an optical approach for quantifying a  
603 wide range of blood flow speeds in live animals. *PLoS One* **7**, e38590 (2012).
- 604 48. J. W. Wu *et al.*, Intravital fluorescence microscopy with negative contrast. *PLoS One* **16**,  
605 e0255204 (2021).

- 606 49. E. M. Pietras *et al.*, Functionally Distinct Subsets of Lineage-Biased Multipotent Progenitors  
607 Control Blood Production in Normal and Regenerative Conditions. *Cell Stem Cell* **17**, 35-46  
608 (2015).
- 609 50. H. Cheng, Z. Zheng, T. Cheng, New paradigms on hematopoietic stem cell differentiation.  
610 *Protein & Cell* **11**, 34-44 (2019).
- 611 51. R. R. Hardy, C. E. Carmack, S. A. Shinton, J. D. Kemp, K. Hayakawa, Resolution and  
612 characterization of pro-B and pre-pro-B cell stages in normal mouse bone marrow. *J Exp Med*  
613 **173**, 1213-1225 (1991).
- 614 52. S. H. Cho *et al.*, Germinal centre hypoxia and regulation of antibody qualities by a hypoxia  
615 response system. *Nature* **537**, 234-238 (2016).
- 616 53. S. Xu *et al.*, von Hippel-Lindau Protein Maintains Metabolic Balance to Regulate the Survival of  
617 Naive B Lymphocytes. *iScience* **17**, 379-392 (2019).
- 618 54. L. W. Lu, D. G. Osmond, Apoptosis and its modulation during B lymphopoiesis in mouse bone  
619 marrow. *Immunol Rev* **175**, 158-174 (2000).
- 620 55. H. J. Markus Werner, Chapter 6 - Proliferation and Differentiation Programs of Developing B  
621 Cells. *Molecular Biology of B Cells (Second Edition)* [https://doi.org/10.1016/B978-0-12-397933-](https://doi.org/10.1016/B978-0-12-397933-9.00006-0)  
622 [9.00006-0](https://doi.org/10.1016/B978-0-12-397933-9.00006-0), 75-97 (2015).
- 623 56. A. Rolink, D. Haasner, F. Melchers, J. Andersson, The surrogate light chain in mouse B-cell  
624 development. *Int Rev Immunol* **13**, 341-356 (1996).
- 625 57. F. Melchers, Checkpoints that control B cell development. *J Clin Invest* **125**, 2203-2210 (2015).
- 626 58. K. Schepers, E. C. Hsiao, T. Garg, M. J. Scott, E. Passegue, Activated Gs signaling in  
627 osteoblastic cells alters the hematopoietic stem cell niche in mice. *Blood* **120**, 3425-3435 (2012).
- 628 59. I. G. Winkler *et al.*, Positioning of bone marrow hematopoietic and stromal cells relative to blood  
629 flow in vivo: serially reconstituting hematopoietic stem cells reside in distinct nonperfused  
630 niches. *Blood* **116**, 375-385 (2010).
- 631 60. N. Burrows *et al.*, Dynamic regulation of hypoxia-inducible factor-1alpha activity is essential for  
632 normal B cell development. *Nat Immunol* **21**, 1408-1420 (2020).
- 633 61. K. Parmar, P. Mauch, J. A. Vergilio, R. Sackstein, J. D. Down, Distribution of hematopoietic  
634 stem cells in the bone marrow according to regional hypoxia. *Proc Natl Acad Sci U S A* **104**,  
635 5431-5436 (2007).
- 636 62. A. Rolink *et al.*, A subpopulation of B220+ cells in murine bone marrow does not express CD19  
637 and contains natural killer cell progenitors. *J Exp Med* **183**, 187-194 (1996).
- 638 63. G. Balciunaite, R. Ceredig, S. Massa, A. G. Rolink, A B220+ CD117+ CD19- hematopoietic  
639 progenitor with potent lymphoid and myeloid developmental potential. *Eur J Immunol* **35**, 2019-  
640 2030 (2005).
- 641 64. T. Nikolic, G. M. Dingjan, P. J. M. Leenen, R. W. Hendriks, A subfraction of B220+ cells in  
642 murine bone marrow and spleen does not belong to the B cell lineage but has dendritic cell  
643 characteristics. *European Journal of Immunology* **32** (2002).
- 644 65. A. L. Blasius, W. Barchet, M. Cella, M. Colonna, Development and function of murine  
645 B220+CD11c+NK1.1+ cells identify them as a subset of NK cells. *J Exp Med* **204**, 2561-2568  
646 (2007).
- 647 66. R. R. Hardy, P. W. Kincade, K. Dorshkind, The protean nature of cells in the B lymphocyte  
648 lineage. *Immunity* **26**, 703-714 (2007).
- 649 67. K. Kita, K. Kawai, K. Hirohata, Changes in bone marrow blood flow with aging. *J Orthop Res* **5**,  
650 569-575 (1987).
- 651 68. T. Ito, Y. Hamazaki, A. Takaori-Kondo, N. Minato, Bone Marrow Endothelial Cells Induce  
652 Immature and Mature B Cell Egress in Response to Erythropoietin. *Cell Struct Funct* **42**, 149-157  
653 (2017).
- 654 69. A. Greenbaum *et al.*, CXCL12 in early mesenchymal progenitors is required for haematopoietic  
655 stem-cell maintenance. *Nature* **495**, 227-230 (2013).

- 656 70. H. Kojima *et al.*, Differentiation stage-specific requirement in hypoxia-inducible factor-1alpha-  
657 regulated glycolytic pathway during murine B cell development in bone marrow. *J Immunol* **184**,  
658 154-163 (2010).
- 659 71. C. Benz *et al.*, Hematopoietic stem cell subtypes expand differentially during development and  
660 display distinct lymphopoietic programs. *Cell Stem Cell* **10**, 273-283 (2012).
- 661 72. B. Dykstra *et al.*, Long-term propagation of distinct hematopoietic differentiation programs in  
662 vivo. *Cell Stem Cell* **1**, 218-229 (2007).
- 663 73. C. E. Muller-Sieburg, R. H. Cho, L. Karlsson, J. F. Huang, H. B. Sieburg, Myeloid-biased  
664 hematopoietic stem cells have extensive self-renewal capacity but generate diminished lymphoid  
665 progeny with impaired IL-7 responsiveness. *Blood* **103**, 4111-4118 (2004).
- 666 74. C. E. Müller-Sieburg, R. H. Cho, M. Thoman, B. Adkins, H. B. Sieburg, Deterministic regulation  
667 of hematopoietic stem cell self-renewal and differentiation. *Blood* **100**, 1302-1309 (2002).
- 668 75. T. A. Shih, M. Roederer, M. C. Nussenzweig, Role of antigen receptor affinity in T cell-  
669 independent antibody responses in vivo. *Nat Immunol* **3**, 399-406 (2002).

670



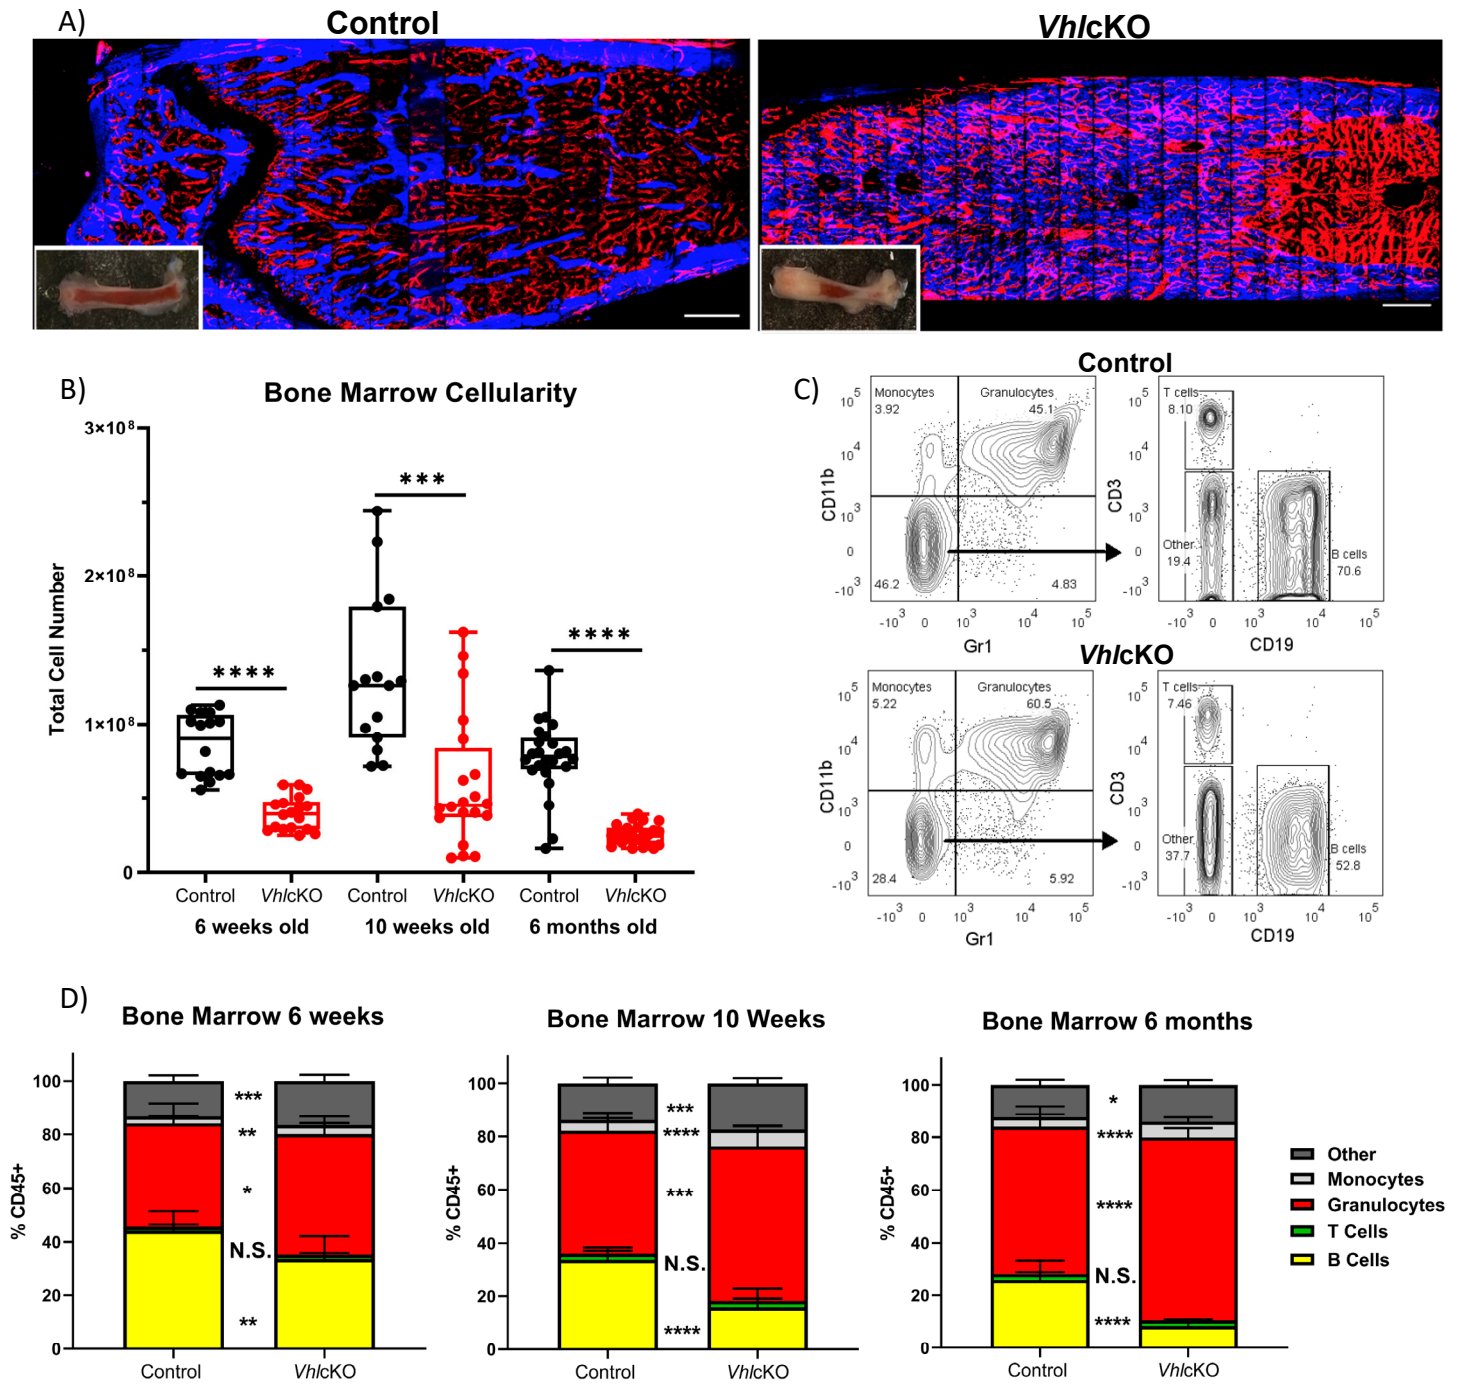

**Figure 1. Bone marrow, spleen and peripheral blood lineage cell defects in the *VhlcKO* mice.** A) Macroscopic and ex vivo imaging of the long bones revealed progressive increases in the bone mass in *VhlcKO* femurs compared with the controls. Inset: photo of the femur. Red: blood vessel (AlexaFluor647 CD31, AlexaFluor647 CD144, AlexaFluor647 Sca-1), Blue: bone (SHG). Scale bar ~100 $\mu$ m; B) bone marrow cellularity, C) representative FACS plots of immune cell lineages; D) frequency analysis of bone marrow lineage cells at 6-weeks of age (left), 10-weeks of age (middle) and 6-month (right).  $p < 0.05^*$ ,  $p < 0.01^{**}$ ,  $p < 0.001^{***}$ ,  $p < 0.0001^{****}$  two-tailed Student's t-test.

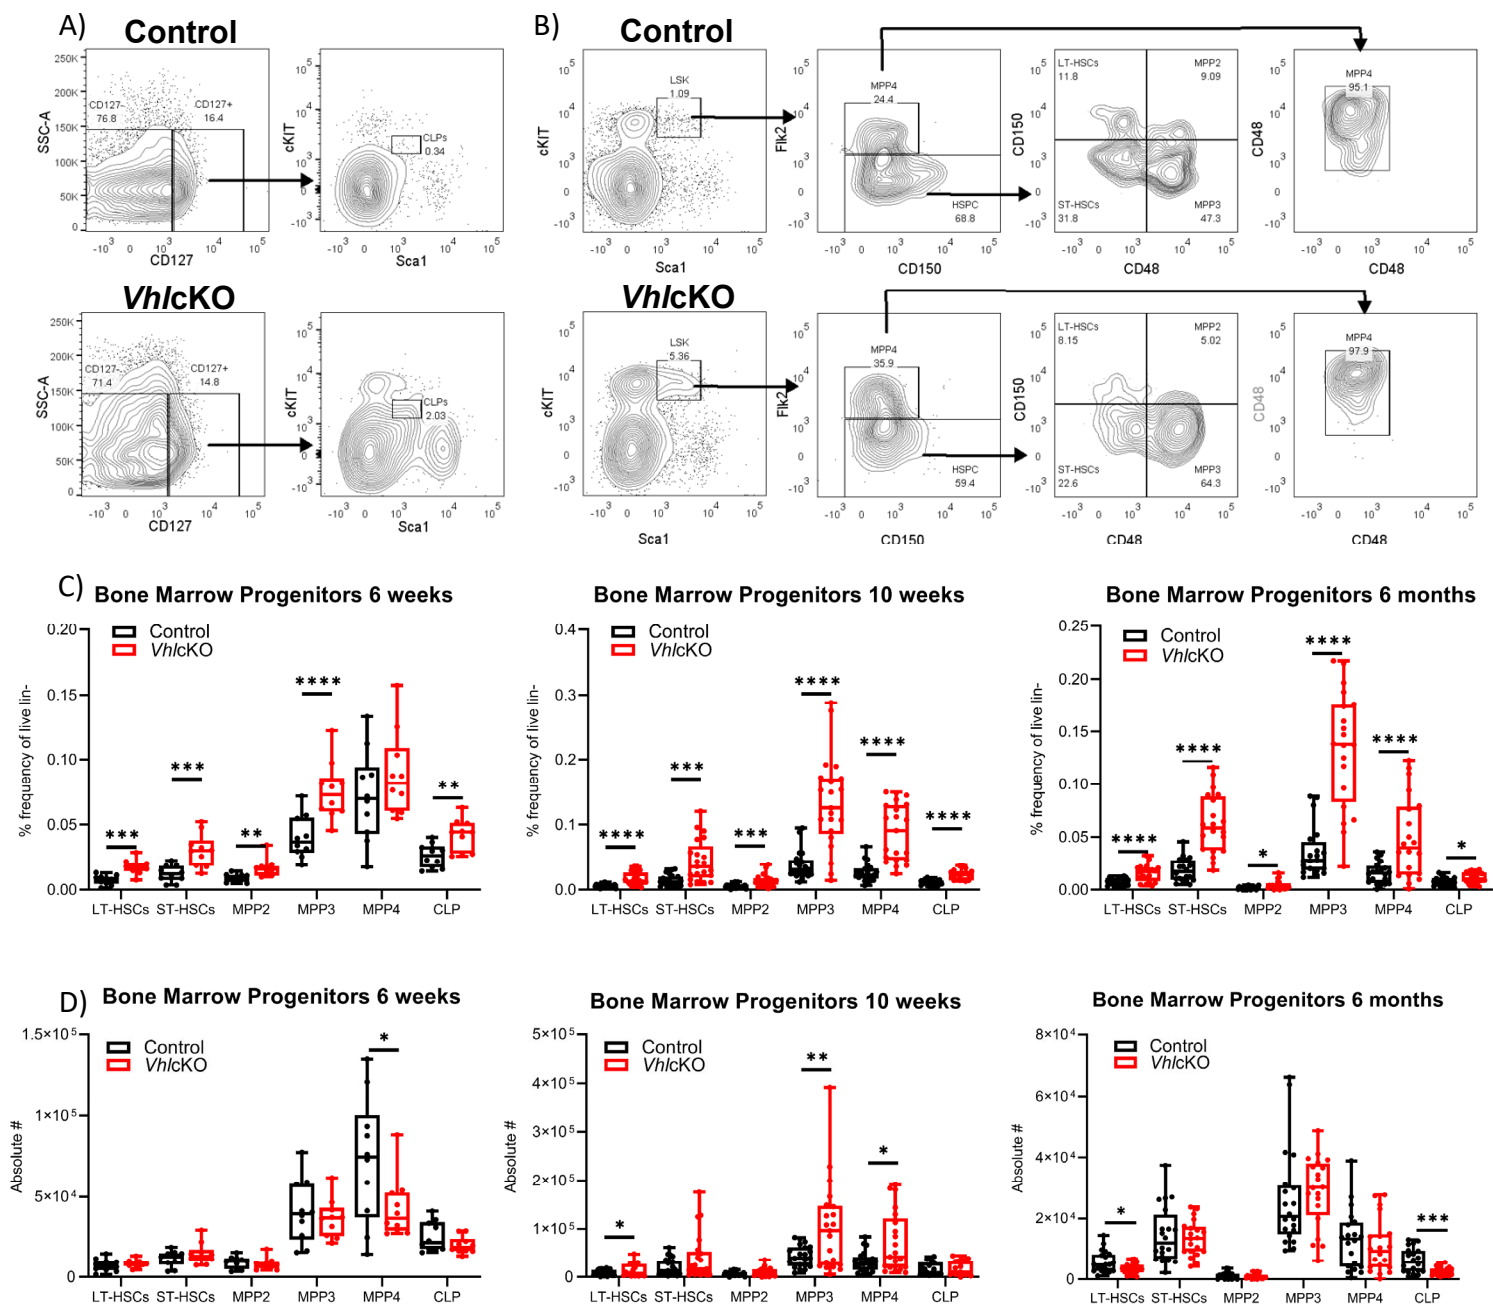

**Figure 2. Altered B cell development in WT→*Vhlc*KO hematopoietic chimeras, demonstrating a cell-extrinsic effect of *Vhl*-deleted osteolineage cells on B cell development.** A) Representative FACS plots of common lymphoid progenitors (CD127<sup>+</sup> Sca1<sup>int</sup> cKit<sup>int</sup>); B) representative FACS plots of hematopoietic progenitors in the bone marrow of controls (top) and *Vhlc*KOs (bottom); C) frequency and D) absolute number of hematopoietic progenitors in the bone marrow in 6-weeks-old (left), 10-weeks-old (middle) and 6-months-old (right) mice. p<0.05\*, p<0.01\*\*, p<0.001\*\*\*, p<0.0001\*\*\*\* two-tailed Student's t-test.

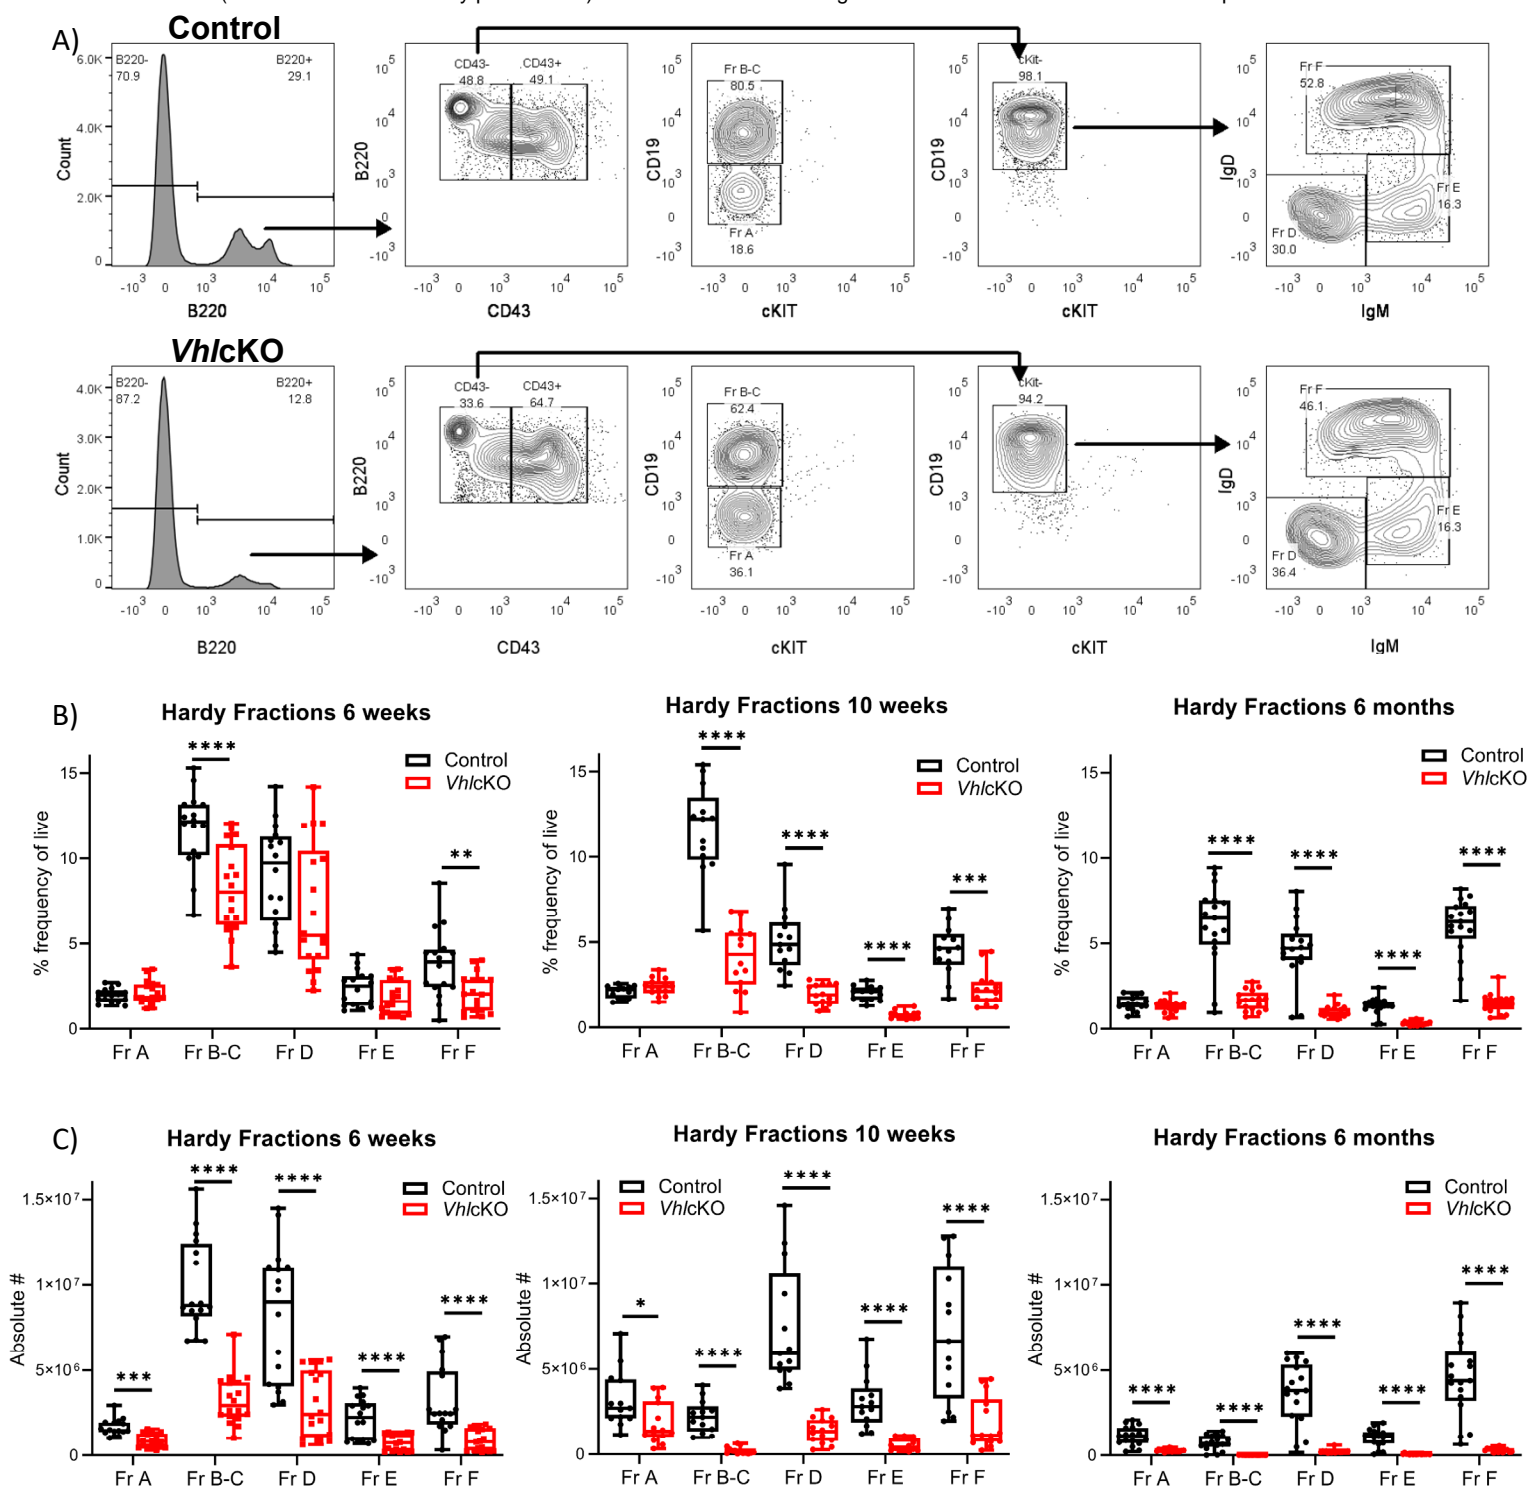

**Figure 3. Dysregulated B cell development in *VhlcKO* mice bone marrow.** A) Representative FACS plot of B cell development in the BM control (top) and *VhlcKO* (bottom); B) B cell frequency in 6-week-old (left), 10-week-old (middle), and 6-month-old (right) mice; C) absolute cell numbers in 6-week-old (left), 10-week-old (middle), and 6-month-old (right).  $p < 0.05^*$ ,  $p < 0.01^{**}$ ,  $p < 0.001^{***}$ ,  $p < 0.0001^{****}$  two-tailed Student's t-test.

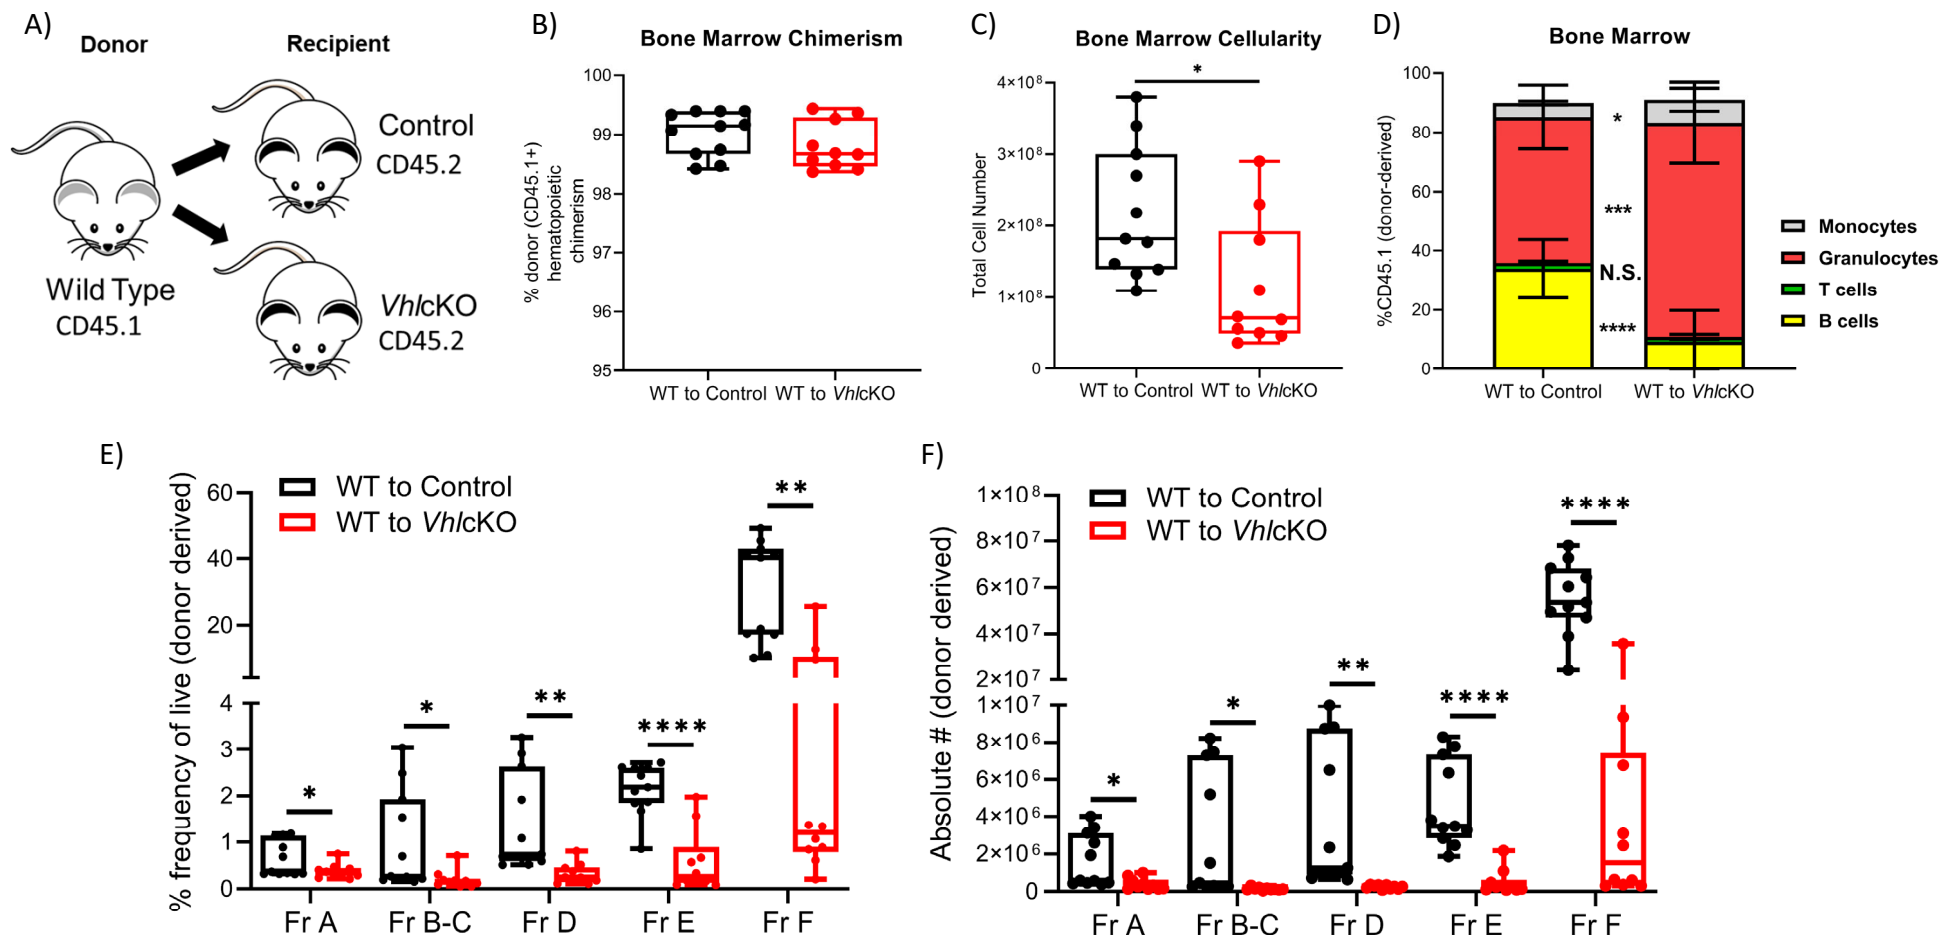

**Figure 4. Altered B cell development in WT→*VhlcKO* hematopoietic chimeras demonstrates a cell-extrinsic effect of the *VhlcKO* bone on B cell development.** Mice were transplanted at 10 weeks of age and were analyzed 16 weeks post-transplantation. A) experimental scheme; B) donor (CD45.1) chimerism; C) bone marrow cellularity; D) frequency of lineage cells in bone marrow; E) B cell frequency and F) absolute number of B cell developmental stages at 16 weeks post-transplant.  $p < 0.05^*$ ,  $p < 0.01^{**}$ ,  $p < 0.001^{***}$ ,  $p < 0.0001^{****}$  two-tailed Student's t-test.



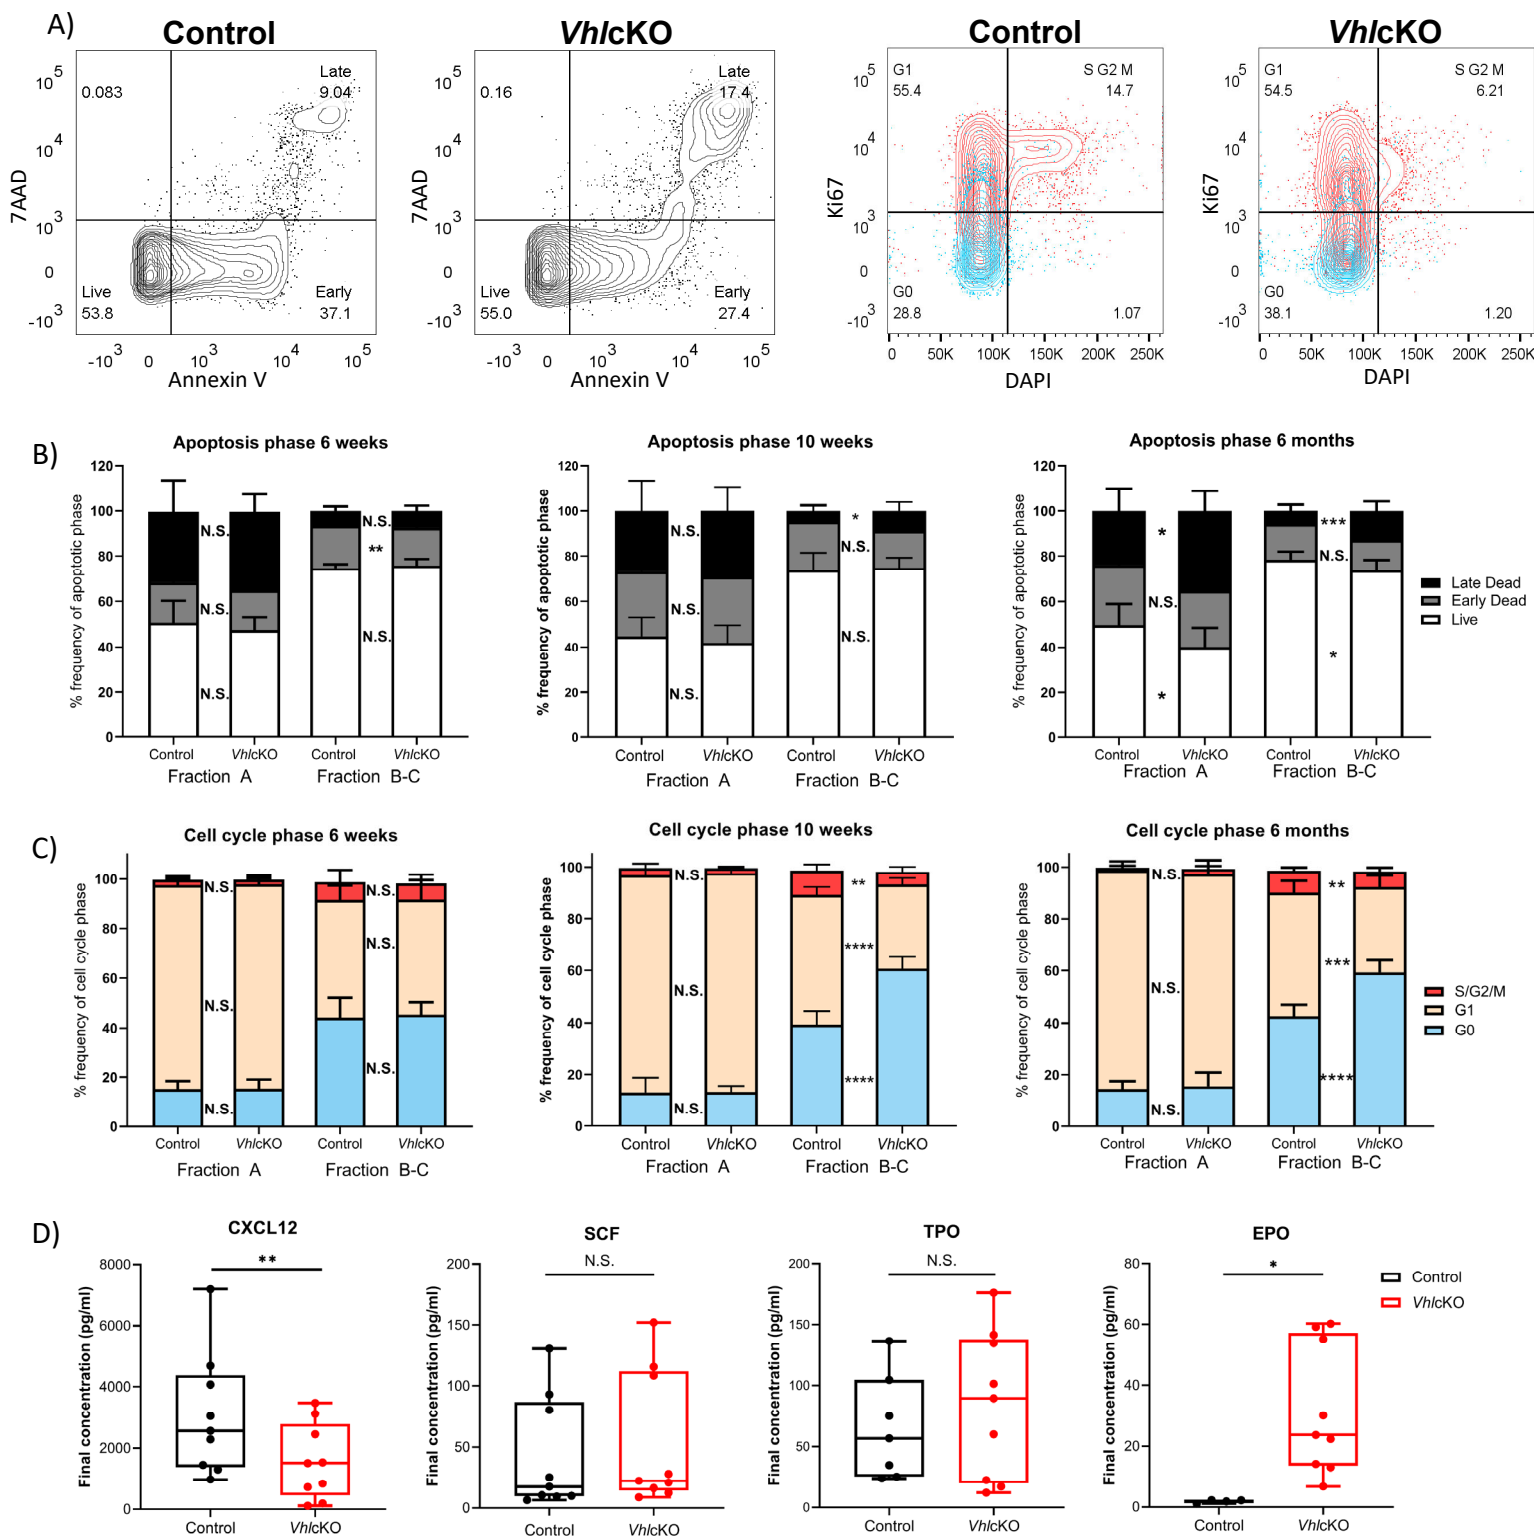

**Figure 5. *VhlcKO* mice display increase apoptosis and reduced cell proliferation during early B cell development.** A) Representative FACS plots of apoptotic phases in B220+ cells (left) and cell cycle phases in B220+ cells (red:CD43+ blue: CD43-) (right); B) frequency of apoptotic phases in Fractions A and B-C in 6-weeks-old, 10-weeks-old and 6-month-old mice; C) frequency of cells in each cell cycle phase within Fractions A and B-C at 6-weeks-old, 10-weeks-old old and 6-month-old mice; (D) CXCL12 , SCF, TPO, and EPO cytokine level measurements in bone marrow serum of control or *VhlcKO* mice.  $p < 0.05$ \*,  $p < 0.01$ \*\*,  $p < 0.001$ \*\*\*,  $p < 0.0001$ \*\*\*\* two-tailed Student's t-test.

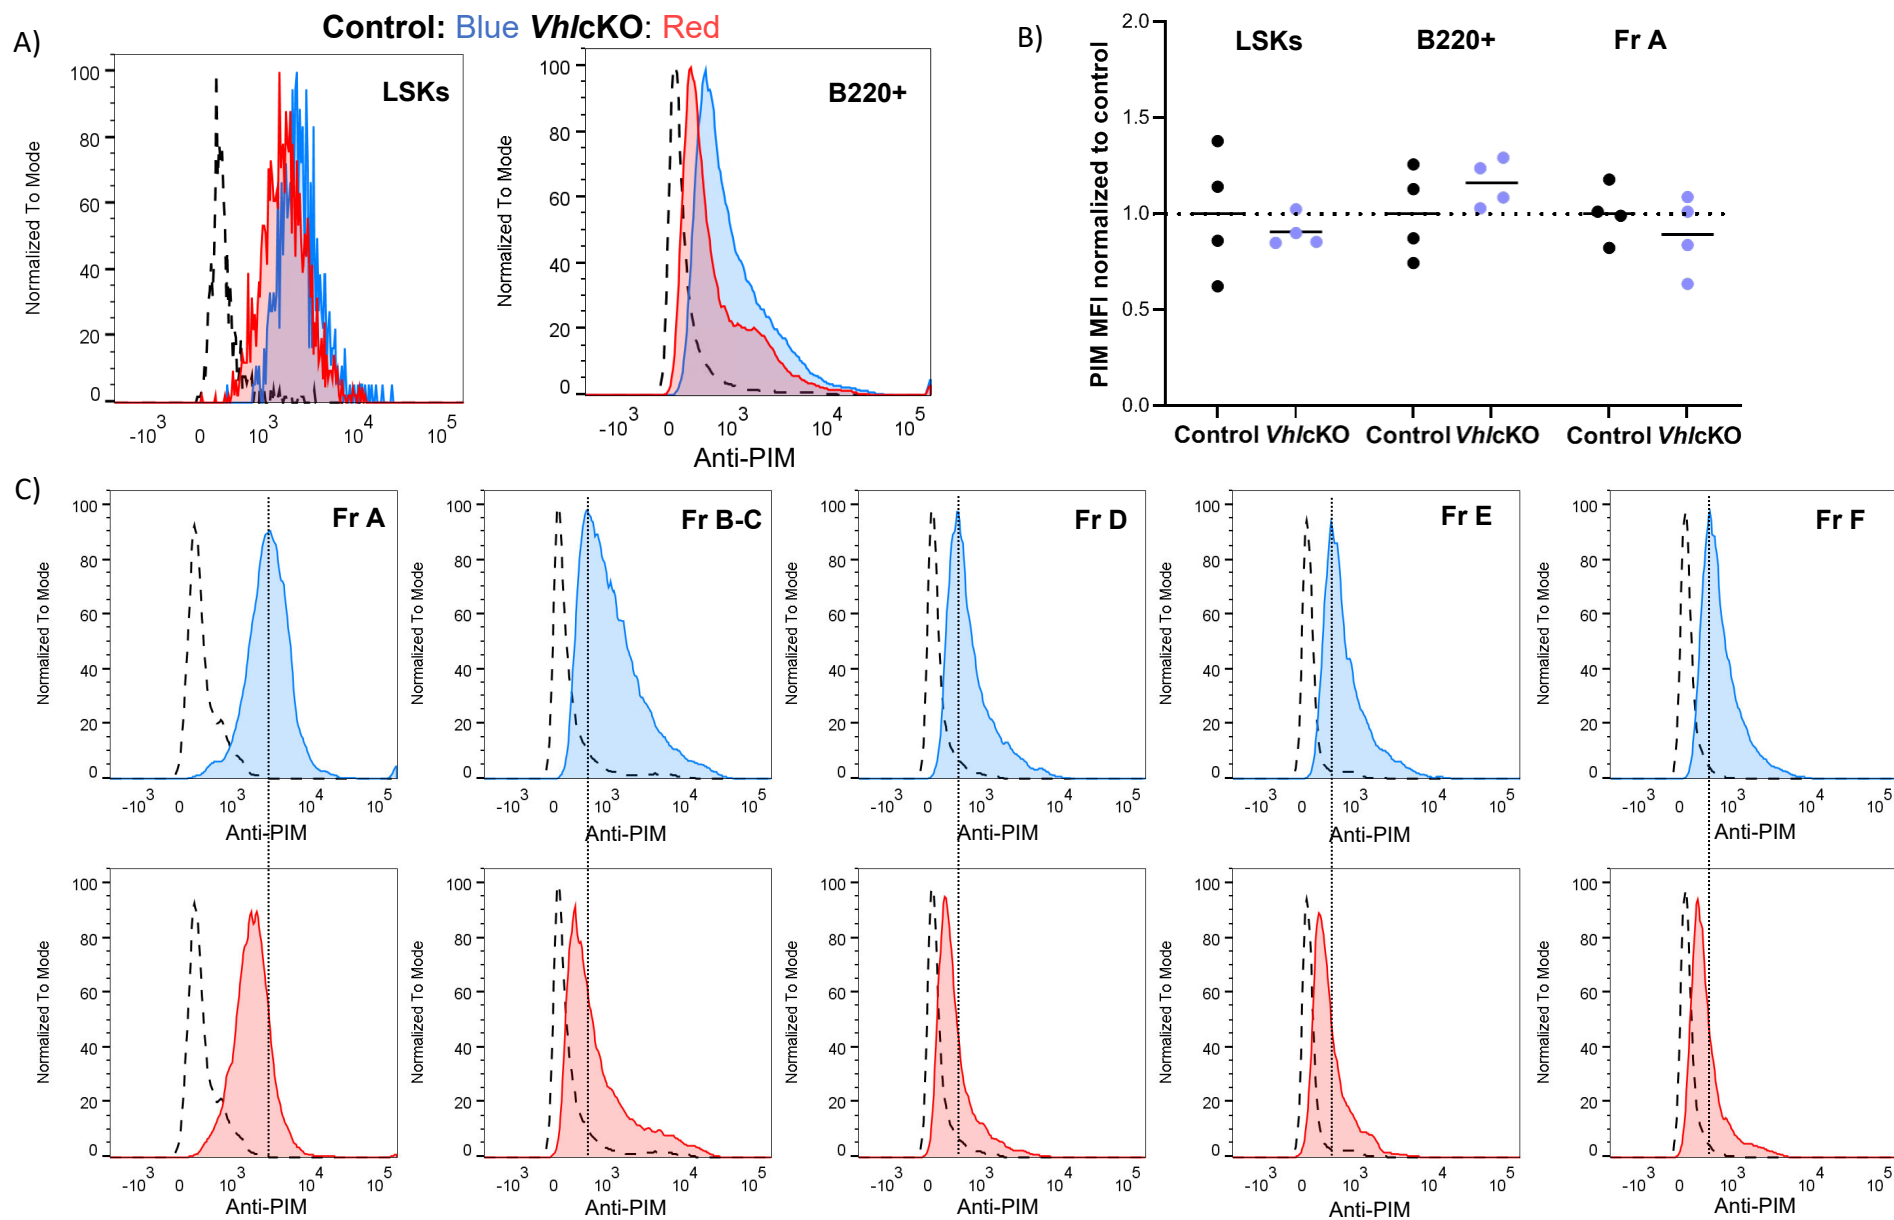

**Figure 6. Hypoxia cell marker pimonidazole indicates difference amongst B cell fractions in control and *VhlcKO* mice.** *VhlcKO* and control mice were injected with PBS or 120 mg/kg pimonidazole (PIM). PIM staining of A) LSKs in the BM and CD45+ B220+ cells; dashed line: isotype control; blue line: anti-PIM staining in control (WT); red: anti-PIM staining in *VhlcKO*; B) summary of PIM staining in four *VhlcKO*s (purple dots) normalized to the mean fluorescence intensity (MFI) in WT controls (black); results from 2 independent experiments are shown; C) representative anti-PIM staining plots of individual B cell Fractions A-F from a control (top) and a *VhlcKO* mouse (bottom). The thin dashed line crossing over the control and *VhlcKO* plots is intended to help visualize the shift in PIM fluorescence intensity in the *VhlcKO* samples.

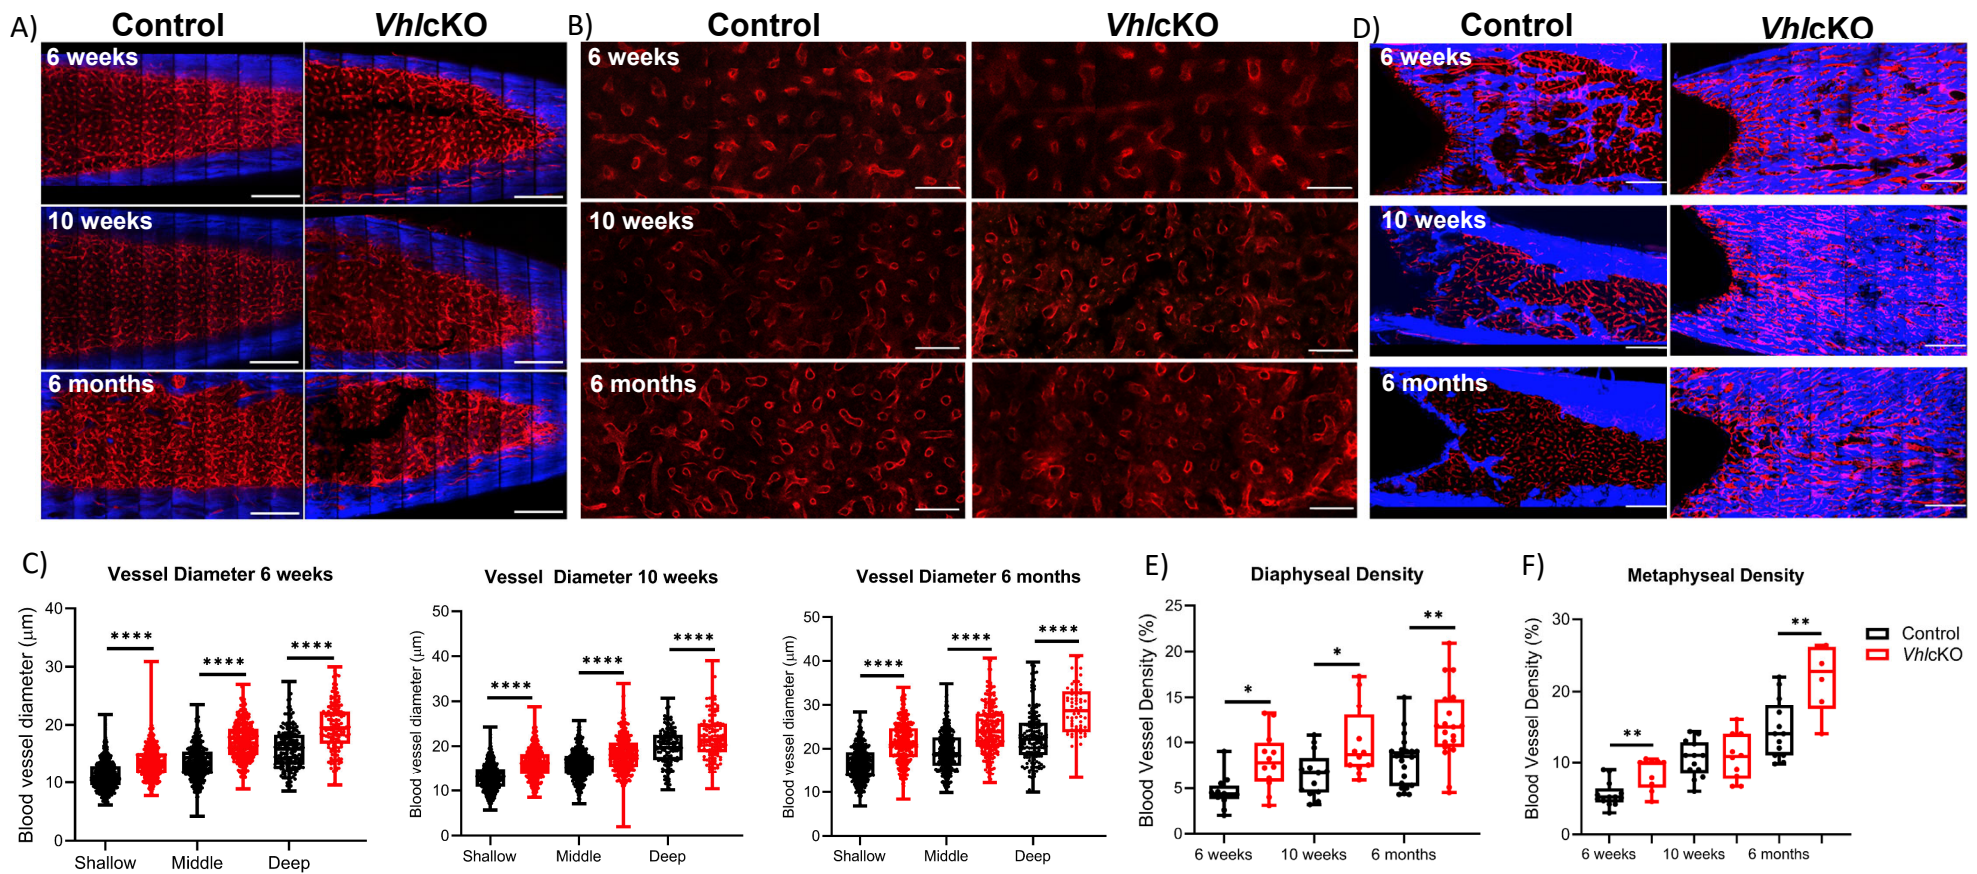

**Figure 7. Ex vivo two-photon imaging of long bones in *VhlcKO* and controls.** A) Representative macroscopic images of the femur diaphyseal BM (scale bars:  $\sim 200 \mu\text{m}$ ), B) magnified z-stacks (scale bars:  $\sim 100 \mu\text{m}$ ), and C) statistical analysis after uDISCO clearing show an increase in the *VhlcKO* vascular diameter relative to the controls; D) *ex vivo* images of femur metaphyseal BM after max intensity projection reveal bone replacement and vascular alteration in *VhlcKO*; E-F) quantification of the metaphyseal and diaphyseal vascular density (scale bars:  $\sim 200 \mu\text{m}$ ). Red: blood vessels (labeled with Alexa647 conjugated antibodies against CD31, CD144, and Sca-1), Blue: bone (SHG: Second harmonic generation). \* $p < 0.05$ , \*\* $p < 0.01$ , \*\*\* $p < 0.001$ , \*\*\*\* $p < 0.0001$ , two-tailed Student's t-test.



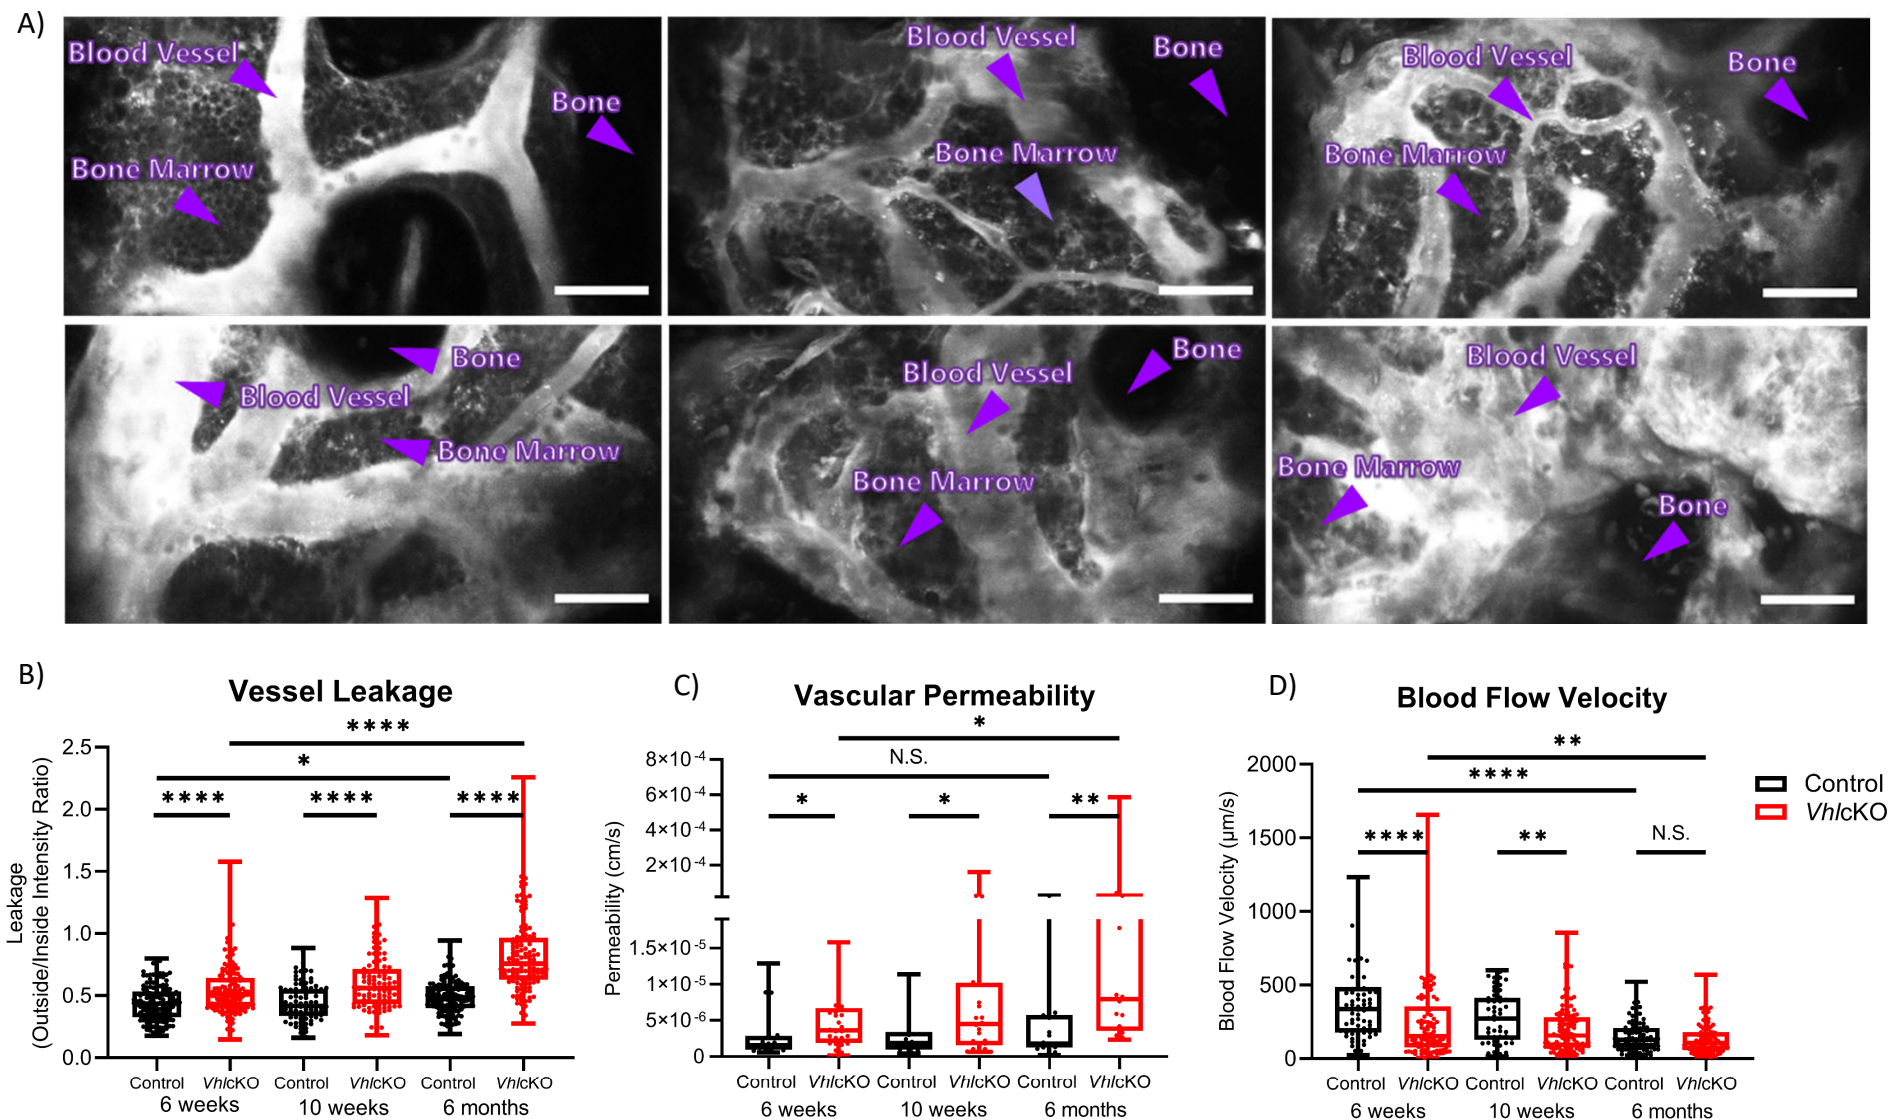

**Figure 8. Disruption in blood-bone marrow barrier revealed by intravital microscopy.** Blood vessel microenvironment comparisons of control and *VhlcKO* mice at 6-week (n=4), 10-week (n=4) and 6-month (n=5) timepoints. A) Representative contrast adjusted max intensity projections of the calvarial BM in control and *VhlcKO* mice by age; White: blood vessel (Rhodamine B Dextran, 70 kDa); scale bar: 50  $\mu\text{m}$ ; quantification of calvarial BM B) blood vessel leakage, C) vascular permeability, and D) blood flow velocity. \* $p < 0.05$ , \*\* $p < 0.01$ , \*\*\* $p < 0.001$ , \*\*\*\* $p < 0.0001$ , Mann-Whitney test.

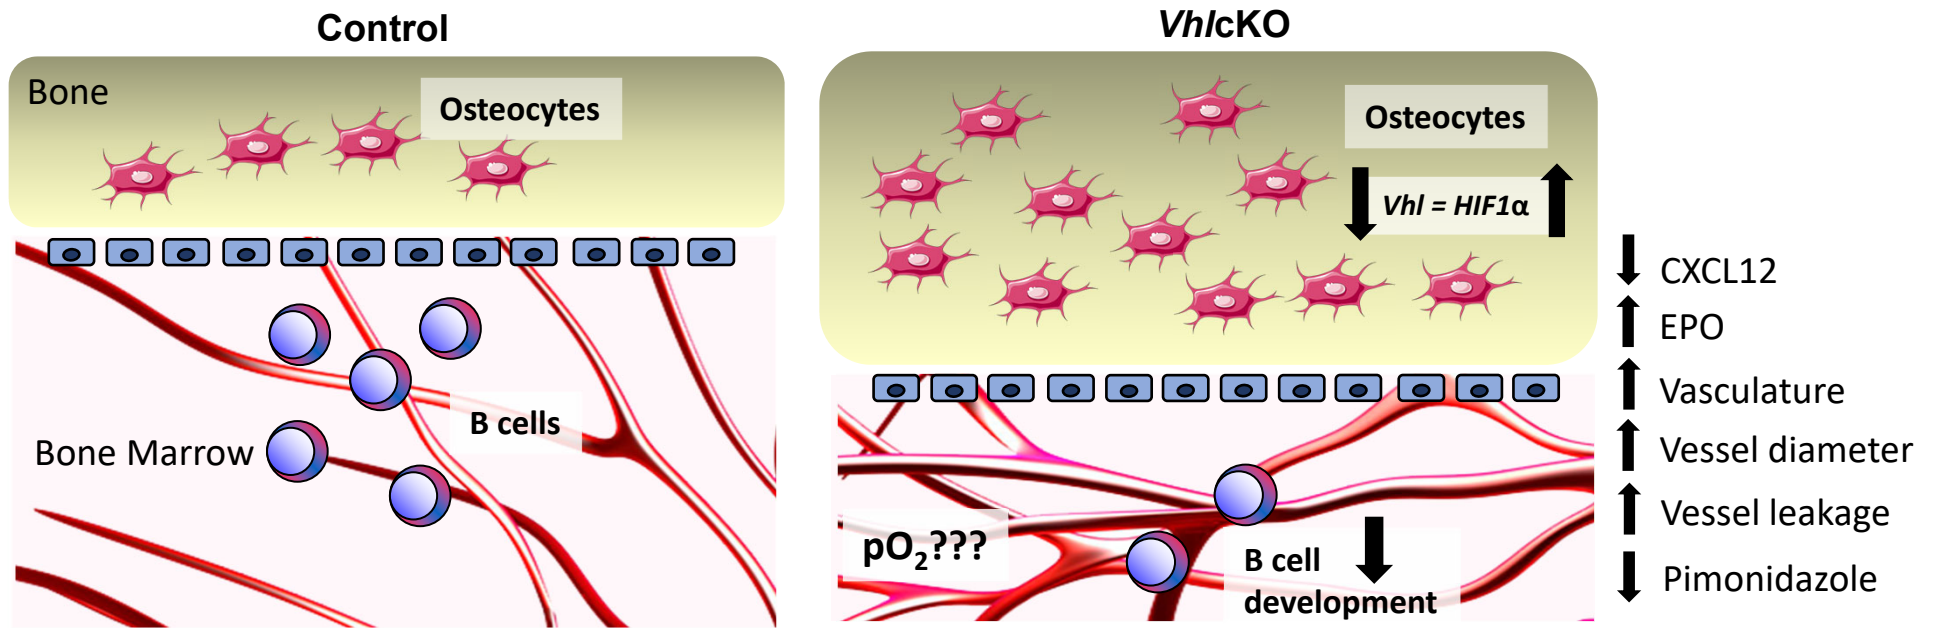

**Figure 9. Working model describing the changes in the bone marrow microenvironment in *VhlcKO* mice.** Left panel: Schematic of healthy control bone marrow where VHL/HIF signaling is intact, the transition from osteoblasts to osteocytes is homeostatically balanced and interactions of developing B cells and stromal cells within their niches promotes their differentiation, maturation and proliferation. Right panel: Lack of *Vhl* in late osteoblasts and osteocytes has a severe effect on hematopoiesis in the bone marrow, changing the B cell niche and indirectly regulating B cell development through decrease of CXCL12, increase of EPO and changes to the BM microenvironment vasculature and permeability. Direct measurement of  $pO_2$  in the BM is necessary to determine if the BM oxygenation landscape is altered compared to controls.

**Table 1. Hematopoietic lineage mean  $\pm$  SD and absolute number  $p < 0.05^*$ ,  $p < 0.01^{**}$ ,  $p < 0.001^{***}$ ,  $p < 0.0001^{****}$  two-tailed Student's t-test.**

| Lineage Population  | CD45+ population (mean% $\pm$ SD) |                      |                  |                      | Absolute Number (mean $\pm$ SD) |                              |                          |                              |
|---------------------|-----------------------------------|----------------------|------------------|----------------------|---------------------------------|------------------------------|--------------------------|------------------------------|
|                     | Bone Marrow                       |                      | Spleen           |                      | Bone Marrow                     |                              | Spleen                   |                              |
|                     | Control                           | <i>Vhl</i> cKO       | Control          | <i>Vhl</i> cKO       | Control                         | <i>Vhl</i> cKO               | Control                  | <i>Vhl</i> cKO               |
| <b>6 weeks old</b>  |                                   |                      |                  |                      |                                 |                              |                          |                              |
| B cells             | 44.16 $\pm$ 7.16                  | 33.69 $\pm$ 8.49**   | 60.71 $\pm$ 2.64 | 58.57 $\pm$ 3.51     | 2.62E+0.7 $\pm$ 7.06E+06        | 8.88E+0.6 $\pm$ 4.83E+06**** | 6.35E+0.7 $\pm$ 1.28E+07 | 5.71E+0.7 $\pm$ 9.18E+06     |
| T cells             | 1.45 $\pm$ 0.79                   | 1.61 $\pm$ 0.62      | 23.65 $\pm$ 3.56 | 23.49 $\pm$ 3.42     | 8.36E+0.5 $\pm$ 4.33E+05        | 3.70E+0.5 $\pm$ 1.87E+05***  | 2.49E+0.7 $\pm$ 6.57E+06 | 2.29E+0.7 $\pm$ 4.93E+06     |
| Monocytes           | 2.58 $\pm$ 0.37                   | 3.28 $\pm$ 0.74**    | 2.55 $\pm$ 0.57  | 1.95 $\pm$ 0.15**    | 1.53E+0.6 $\pm$ 3.92E+05        | 7.81E+0.5 $\pm$ 3.48E+05**** | 2.66E+0.6 $\pm$ 7.87E+05 | 1.90E+0.6 $\pm$ 2.96E+05*    |
| Granulocytes        | 38.46 $\pm$ 7.61                  | 44.85 $\pm$ 6.47*    | 2.85 $\pm$ 2.55  | 2.28 $\pm$ 0.66      | 2.42E+0.7 $\pm$ 1.12E+07        | 1.06E+0.7 $\pm$ 4.30E+06***  | 2.71E+0.6 $\pm$ 2.19E+06 | 2.17E+0.6 $\pm$ 5.06E+05     |
| <b>10 weeks old</b> |                                   |                      |                  |                      |                                 |                              |                          |                              |
| B cells             | 33.8 $\pm$ 4.55                   | 15.83 $\pm$ 7.01**** | 60.71 $\pm$ 7.63 | 46.37 $\pm$ 7.53**** | 3.32E+0.7 $\pm$ 1.47E+07        | 8.02E+0.6 $\pm$ 1.29E+07***  | 1.22E+08 $\pm$ 6.02E+07  | 1.18E+08 $\pm$ 5.98E+07      |
| T cells             | 2.34 $\pm$ 1.04                   | 2.35 $\pm$ 0.95      | 26.67 $\pm$ 6.15 | 29.09 $\pm$ 4.11     | 2.55E+0.6 $\pm$ 1.92E+06        | 1.05E+0.6 $\pm$ 1.35E+06*    | 6.22E+07 $\pm$ 5.28E+07  | 8.10E+07 $\pm$ 5.40E+07      |
| Monocytes           | 4.09 $\pm$ 0.67                   | 6.23 $\pm$ 1.25****  | 2.50 $\pm$ 0.36  | 2.71 $\pm$ 0.38      | 4.08E+0.6 $\pm$ 2.08E+06        | 2.41E+0.6 $\pm$ 1.89E+06*    | 5.49E+06 $\pm$ 4.12E+06  | 7.02E+06 $\pm$ 3.81E+06      |
| Granulocytes        | 45.93 $\pm$ 6.89                  | 58.11 $\pm$ 7.78***  | 1.15 $\pm$ 0.50  | 6.27 $\pm$ 2.93****  | 4.36E+0.7 $\pm$ 1.60E+07        | 2.22E+0.7 $\pm$ 1.50E+07**   | 2.14E+06 $\pm$ 9.96E+05  | 1.66E+07 $\pm$ 1.46E+07**    |
| <b>6 months old</b> |                                   |                      |                  |                      |                                 |                              |                          |                              |
| B cells             | 25.74 $\pm$ 7.62                  | 8.37 $\pm$ 1.76****  | 61.38 $\pm$ 7.09 | 42.44 $\pm$ 3.65**** | 1.48E+0.7 $\pm$ 7.35E+06        | 9.73E+0.5 $\pm$ 2.56E+05**** | 4.33E+0.7 $\pm$ 2.04E+07 | 2.77E+0.7 $\pm$ 7.48E+06**   |
| T cells             | 2.21 $\pm$ 0.62                   | 2.23 $\pm$ 0.38      | 25.55 $\pm$ 2.81 | 25.88 $\pm$ 2.68     | 1.20E+0.6 $\pm$ 5.48E+05        | 2.58E+0.5 $\pm$ 5.65E+04**** | 1.66E+0.7 $\pm$ 6.08E+06 | 1.70E+0.7 $\pm$ 5.08E+06     |
| Monocytes           | 3.57 $\pm$ 1.31                   | 5.98 $\pm$ 1.69****  | 1.82 $\pm$ 0.47  | 2.60 $\pm$ 0.67***   | 1.94E+0.6 $\pm$ 9.20E+05        | 6.97E+0.5 $\pm$ 2.28E+05**** | 1.19E+0.6 $\pm$ 3.95E+05 | 1.74E+0.6 $\pm$ 7.95E+05*    |
| Granulocytes        | 56.01 $\pm$ 7.91                  | 69.31 $\pm$ 3.49**** | 2.83 $\pm$ 4.41  | 14.33 $\pm$ 3.33**** | 3.08E+0.7 $\pm$ 1.26E+07        | 8.22E+0.6 $\pm$ 2.11E+06**** | 1.64E+0.6 $\pm$ 2.16E+06 | 9.52E+0.6 $\pm$ 3.42E+06**** |

**Table 2. Mode Fluorescence Intensity of PIM staining on B cell fractions in control and *Vhl* cKO**

| Genotype       | Treatment | MFI (mode) |        |      |      |      |
|----------------|-----------|------------|--------|------|------|------|
|                |           | Fr A       | Fr B-C | Fr D | Fr E | Fr F |
| <i>Vhl</i> cKO | Isotype   | 336        | 125    | 146  | 187  | 146  |
| <i>Vhl</i> cKO | Isotype   | 358        | 166    | 166  | 166  | 208  |
| Control        | PIM       | 3561       | 742    | 588  | 663  | 613  |
| Control        | PIM       | 3234       | 769    | 663  | 663  | 689  |
| Control        | PIM       | 2292       | 493    | 470  | 470  | 402  |
| Control        | PIM       | 3926       | 769    | 715  | 663  | 663  |
| <i>Vhl</i> cKO | PIM       | 2514       | 493    | 402  | 336  | 424  |
| <i>Vhl</i> cKO | PIM       | 2593       | 613    | 516  | 540  | 588  |
| <i>Vhl</i> cKO | PIM       | 3926       | 689    | 570  | 663  | 564  |
| <i>Vhl</i> cKO | PIM       | 3561       | 588    | 516  | 493  | 516  |
